1       **Lipopolysaccharide induces placental mitochondrial dysfunction by reducing**  
2                                   **MNRR1 levels via a TLR4-independent pathway**

3  
4       Neeraja Purandare<sup>1,5</sup>, Yusef Kunji<sup>5</sup>, Yue Xi<sup>9</sup>, Roberto Romero<sup>1, 3-7</sup>, Nardhy Gomez-  
5                   Lopez<sup>1,2,8</sup>, Andrew Fribley<sup>9</sup>, Lawrence I. Grossman<sup>1,5</sup>, Siddhesh Aras<sup>1,5</sup>

6  
7       <sup>1</sup>Perinatology Research Branch, Division of Obstetrics and Maternal-Fetal Medicine, Division of  
8       Intramural Research, *Eunice Kennedy Shriver* National Institute of Child Health and Human  
9       Development, National Institutes of Health, U.S. Department of Health and Human Services  
10      (NICHHD/NIH/DHHS); Bethesda, Maryland, and Detroit, Michigan, USA.

11     <sup>2</sup>Department of Obstetrics and Gynecology, Wayne State University School of Medicine; Detroit,  
12     Michigan, USA.

13     <sup>3</sup>Department of Obstetrics and Gynecology, University of Michigan; Ann Arbor, Michigan, USA.

14     <sup>4</sup>Department of Epidemiology and Biostatistics, Michigan State University; East Lansing,  
15     Michigan, USA.

16     <sup>5</sup>Center for Molecular Medicine and Genetics, Wayne State University; Detroit, Michigan, USA.

17     <sup>6</sup>Detroit Medical Center; Detroit, Michigan, USA.

18     <sup>7</sup>Department of Obstetrics and Gynecology, Florida International University; Miami, Florida, USA.

19     <sup>8</sup>Department of Biochemistry, Microbiology, and Immunology, Wayne State University School of  
20     Medicine; Detroit, Michigan, USA.

21     <sup>9</sup>Department of Pediatrics, Wayne State University School of Medicine; Detroit, Michigan, USA.

22  
23     **Keywords:** CHCHD2, YME1L1, ATM kinase, NOX2, inflammation, preterm birth, trophoblasts

24     **Short title:** MNRR1, a linchpin target for bacterial endotoxin induced mitochondrial dysfunction

25

26 **Abstract**

27 Mitochondria play a key role in the growth and development of the placenta, an organ  
28 essential for pregnancy in eutherian mammals. Mitochondrial dysfunction has been  
29 associated with pregnancy pathologies. However, the mechanisms whereby placental  
30 mitochondria sense inflammatory signals at a cellular and mechanistic level are unknown.  
31 Mitochondrial Nuclear Retrograde Regulator 1 (MNRR1) is a bi-organelle protein  
32 responsible for optimal mitochondrial function to achieve energy and redox homeostasis.  
33 In addition, MNRR1 also is required for optimal induction of cellular stress-responsive  
34 signaling pathways such as the mitochondrial unfolded protein response (UPR<sup>mt</sup>). Here,  
35 in a lipopolysaccharide-induced model of placental inflammation, we show that MNRR1  
36 levels are reduced in placental tissues and cell lines. Reduction in MNRR1 is associated  
37 with mitochondrial dysfunction and enhanced oxidative stress along with activation of pro-  
38 inflammatory signaling. Mechanistically, we uncover a non-conventional pathway  
39 independent of Toll-like receptor 4 (TLR4) that results in a specific ATM kinase-dependent  
40 threonine phosphorylation and activation of a mitochondrial protease, YME1L1,  
41 degrading MNRR1. Furthermore, enhancing MNRR1 levels in placental cells either  
42 genetically or with specific activators abrogates the bioenergetic defect and induces an  
43 anti-inflammatory phenotype, suggesting that MNRR1 is upstream of the mitochondrial  
44 dysfunction observed in our model. Reduction in MNRR1 levels is a generalized  
45 phenomenon observed in cells under an inflammatory stimulus. We therefore propose  
46 MNRR1 as a novel anti-inflammatory therapeutic target in pathologies associated with  
47 placental inflammation.

48

## 49 **Introduction**

50 Spontaneous preterm birth – the birth of a baby before 37 weeks of gestation – is the  
51 leading cause of neonatal mortality and morbidity worldwide [1, 2]. Spontaneous preterm birth is  
52 preceded by preterm labor, a syndrome of multiple etiologies including local and systemic  
53 inflammation [3], which results from the immune activation triggered by microbes invading the  
54 amniotic cavity [4] or danger signals derived from cellular necrosis or stress [5]. Most research  
55 has focused on investigating the inflammatory pathways taking place in the intra-amniotic cavity  
56 containing the placenta; however, the role of mitochondria acting as a sensor of cellular stress  
57 has been less investigated.

58 Under healthy conditions, mitochondria are required to generate energy for cellular  
59 functioning in the form of ATP. This process is fine-tuned to respond to stress signals by slowing  
60 ATP production and activating immune response pathways such as by generating reactive  
61 oxygen species (ROS) [6] and other biological processes [6-8]. The role of placental mitochondria  
62 has only recently been reported in normal gestation [9, 10]. Yet, mitochondrial dysfunction has  
63 also been associated with pregnancy complications including preeclampsia [11, 12], intrauterine  
64 growth restriction [13], maternal adiposity [14, 15], gestational diabetes [16], and spontaneous  
65 preterm birth [17], all of which are associated with inflammatory responses [18-25]. Specifically,  
66 these studies have shown that some electron transport chain (ETC) subunits, chaperones, ROS-  
67 scavenging enzymes, and mitochondrial DNA (mtDNA) levels are altered in such complicated  
68 pregnancies. However, the mechanisms whereby placental mitochondria sense inflammatory  
69 signals at a cellular and mechanistic level are not clearly known.

70 We previously showed that MNRR1 (CHCHD2; AAG10) regulates mitochondrial function  
71 by acting in two compartments – the mitochondria and the nucleus [26-29]. Mitochondrial MNRR1  
72 interacts with complex IV (cytochrome *c* oxidase; COX) of the ETC to regulate oxygen  
73 consumption and can alter apoptosis by interacting with Bcl-xL [30]. In the nucleus, MNRR1  
74 regulates the transcription of numerous genes including subunits of ETC complexes, ROS

75 scavenger genes, and proteins that regulate mitochondrial proliferation [27, 31, 32]. Here, we  
76 have characterized the role of MNRR1 *in vivo* using placental tissues from a murine model of  
77 lipopolysaccharide (LPS)-induced preterm birth and *in vitro* using cultured trophoblast (i.e.,  
78 placental) cell lines. We find that LPS reduces MNRR1 levels in placental tissue as well as in  
79 trophoblast cell lines. We then went on to identify a novel pathway that results in MNRR1-  
80 dependent mitochondrial dysfunction, thereby uncovering potential therapeutic targets. Taken  
81 together, our work shows that MNRR1 plays a protective role by not only activating mitochondria  
82 but also by inducing an anti-inflammatory response to ameliorate the deleterious effects of  
83 placental inflammation.

84



## 85 **Results**

86

### 87 **Decreased MNRR1 impairs mitochondrial function in human placental cells *in vitro***

88 MNRR1 modulates several mitochondrial functions including oxygen consumption, ATP  
89 production, and generation of ROS [27]. To analyze these effects in a human system *in vitro*, we  
90 generated a placental cell culture model of LPS-induced inflammation using the trophoblast cell  
91 line HTR8/SVNeo (HTR). Since inflammation suppresses mitochondrial function [33-38], we first  
92 determined the effect of inflammation on MNRR1 in these placental cells. When we measured  
93 the basal oxygen consumption rate (OCR) in intact trophoblast cells treated with LPS, we found  
94 an ~30% decrease (**Fig. 1A**). We wondered whether this decreased OCR affects ATP levels and  
95 found an ~18% decrease in total cellular ATP (**Fig. 1B**). Furthermore, both total intracellular ROS  
96 and mitochondrial ROS were increased (**Fig. 1C**). Similar findings were previously made in  
97 immune cells [6] and for total ROS in another trophoblast cell line, Sw.71 [39]. This decrease in  
98 OCR can be completely rescued (and enhanced) by overexpressing WT-MNRR1 (**Fig. 1D**). The  
99 decrease in OCR is consistent with inhibition also at the protein level (**Fig. 1E, Supplementary**  
100 **Figure 1A**). To further link MNRR1 levels with mitochondrial function, we inhibited MNRR1  
101 expression pharmacologically (Clotrimazole; **Supplementary Figure 2A**), which sensitized cells  
102 to the effect of LPS on OCR (**Fig. 1F (left), bars 3 and 4**) and an activator (Nitazoxanide;  
103 **Supplementary Figure 2A**), which prevented these effects (**Fig. 1F (left), bars 5 and 6**). We  
104 also examined the effects of MNRR1 inhibition and activation on an inflammatory marker by  
105 assessing JNK phosphorylation (**Fig. 1E**). Chemical inhibition of MNRR1 acts similarly to LPS  
106 mediated inflammation in increasing JNK phosphorylation (**Fig. 1F (right)**). Importantly, chemical  
107 activation of MNRR1 by Nitazoxanide prevents this increase even after LPS-treatment (**Fig. 1F**  
108 **(right)**), suggesting that such activators could be repurposed therapeutically to treat placental  
109 inflammation.

110

111 **MNRR1 levels are reduced in a murine bacterial endotoxin model of placental inflammation**

112 ***in vivo***

113 To assess the *in vivo* relevance of our observations in cultured placental cells, we utilized  
114 a mouse model of LPS-induced inflammation. LPS treatment is known to induce a high rate  
115 (~80%) of preterm labor and birth [40]. Our examination of MNRR1 protein levels in placental  
116 lysates from LPS-treated mice showed them to be significantly decreased (**Fig. 2A**). We then  
117 immunostained the placental tissue from LPS injected mice and found MNRR1 protein levels to  
118 be reduced compared to those injected with phosphate buffered saline (controls) (**Fig. 2B**). Given  
119 the reduced MNRR1 levels after LPS treatment, we analyzed whether transcript levels of MNRR1  
120 were also reduced but found them to be unchanged (**Supplementary Fig. 1B**), suggesting a post-  
121 translational effect.

122 Since the intraperitoneal injection of LPS in pregnant mice is considered to model a  
123 systemic maternal inflammatory response [40, 41], we tested a human placental tissue sample  
124 from women with clinical chorioamnionitis [42] who delivered preterm. In this sample, we found  
125 MNRR1 levels considerably reduced in the villous layer of the placenta and moderately so in the  
126 base plate (**Fig. 2C**). Mirroring the *in vivo* data from mice, MNRR1 was reduced at the protein  
127 level in HTR cells (**Fig. 1E**) but not at transcript levels (**Supplementary Fig. 1C and 1D**). We also  
128 measured JNK phosphorylation [43, 44], and found increased activation (**Fig. 1E**). Our data with  
129 both mouse and human placental samples thus suggest that MNRR1 reduction occurs in  
130 response to maternal systemic inflammation. We considered whether other cell types reduce  
131 MNRR1 levels in response to LPS and examined both placental and non-placental cell lines. We  
132 found reduced MNRR1 levels after LPS-treatment in all the cell lines tested, suggesting that  
133 MNRR1 reduction is a ubiquitous phenomenon (**Supplementary Fig. 1A**).

134

135 **Increased YME1L1 protease reduces mitochondrial MNRR1 levels in human placental cells**

136 ***in vitro***

137           Since MNRR1 is a bi-organelle protein that is localized both to the mitochondria and the  
138 nucleus [27-29], we determined the effect of LPS on MNRR1 levels in each of the compartments.  
139 We found that most of the decrease at the protein level was accounted for by mitochondrial  
140 MNRR1 (**Figs. 3A and 3B**), strikingly so when visualized by confocal microscopy (**Fig. 3B**). To  
141 investigate how the mitochondrial reduction in MNRR1 takes place, we assessed the protein  
142 levels of YME1L1, a mitochondrial intermembrane space (IMS) protease previously shown to be  
143 responsible for the turnover of mitochondrial MNRR1 [32]. We found that levels of YME1L1 are  
144 increased by LPS treatment (**Fig. 3C**). We then tested whether MNRR1 is reduced in the absence  
145 of YME1L1 and found that it is not by using LPS-treated 293 cells from which YME1L1 had been  
146 knocked out (YME1L1-KO) (**Supplementary Fig. 3A**). The levels of OMA1, another protease that  
147 has been identified to turn over MNRR1 under cellular stress [45], are not increased with LPS  
148 treatment (**Supplementary Fig. 3A and B**), thereby suggesting that the upstream inflammatory  
149 signaling pathway involves only YME1L1. To further define the role of YME1L1 in regulating  
150 MNRR1 levels in mitochondria, we utilized a version of YME1L1 mutated to eliminate protease  
151 activity (protease-dead; PD) [46]. In cells overexpressing PD-YME1L1, levels of MNRR1 were  
152 again not reduced after LPS treatment (**Fig. 3D**). Moreover, examination of a known substrate of  
153 YME1L1 proteolysis, STARD7 [46, 47], showed LPS-stimulated reduction with active YME1L1  
154 but not with PD-YME1L1, like MNRR1 (**Fig. 3D**). Thus, we find that protease YME1L1 levels are  
155 increased in cells treated with LPS, thereby reducing the level of MNRR1.

156

### 157 **ATM kinase mediated phosphorylation of YME1L1 enhances its stability**

158           The finding that YME1L1 protein levels were increased in LPS-treated placental cells (**Fig.**  
159 **3C**) whereas transcript levels were unaffected (**Supplementary Fig. 3C**) suggested increased  
160 protein stability. We confirmed this finding by carrying out a cycloheximide chase experiment,  
161 which showed increased stability after blocking new protein synthesis (**Fig. 4A**). To uncover the  
162 basis of the increased stability, we hypothesized a protein modification and thus examined the

163 post-translational profile of YME1L1. Upon treatment with LPS, YME1L1 protein in HTR cells  
164 displayed enhanced threonine phosphorylation but not serine or tyrosine phosphorylation (**Fig.**  
165 **4B, Supplementary Fig. 3D**).

166 To identify the threonine kinase for which YME1L1 is a substrate, we used Scansite  
167 (<https://scansite4.mit.edu/4.0/#home>), which identified ATM and NEK6 as candidate kinases for  
168 YME1L1 under high stringency conditions (**Supplementary Fig. 4A**). Of these, ATM kinase was  
169 found to interact with YME1L1 in LPS-treated placental cells (**Supplementary Fig. 4B**) whereas  
170 NEK6 kinase did not (**Supplementary Fig. 4C**). To further assess this bioinformatic prediction,  
171 we utilized an inhibitor of ATM kinase activity and found that LPS-stimulated threonine  
172 phosphorylation of YME1L1 was blocked (**Fig. 4C**). Furthermore, turnover of MNRR1 and  
173 YME1L1 substrate STARD7 was also blocked by the same ATM inhibitor (**Supplementary Fig.**  
174 **4D**). We next asked whether LPS induced threonine phosphorylation of YME1L1 can affected  
175 stability of the protease. We found that YME1L1 half-life (8.1 h) is more than doubled by LPS  
176 treatment (22.0 h) and that this stabilization is lost when ATM kinase is inhibited (**Fig. 4D**). These  
177 results suggest that YME1L1 stability is enhanced upon threonine phosphorylation by ATM kinase  
178 in LPS treated placental cells, resulting in increased MNRR1 turnover with subsequent reduction  
179 of mitochondrial OCR (**Figs. 1A, 1D, and 1F**), increased ROS levels (**Fig. 1C**), and activation of  
180 pro-inflammatory signaling (**Figs. 1E and 1F**). Our results thus show that MNRR1 reduction  
181 results from stabilization of YME1L1 protease upon phosphorylation by ATM kinase.

182  
183 **ROS generated by NOX2 activates ATM kinase in bacterial endotoxin treated placental**  
184 **cells *in vitro***

185 To probe in more detail the upstream basis of enhanced YME1L1 stability, we noted a  
186 previously defined inflammatory pathway in which activation of ATM kinase by NOX2 was  
187 demonstrated [48]. To determine whether this pathway was operating here we first examined  
188 whether NOX2 increased in LPS treated cells and found a robust increase (**Fig. 5A**). We then

189 inhibited NOX2 to ask whether doing so prevented the LPS-dependent reduction in MNRR1 levels  
190 and found that MNRR1 was stabilized by the NOX2 inhibitor GSK2795039 (**Fig. 5B**).

191         If a NOX2-generated “ROS burst” is upstream of mitochondrial ROS [49], we hypothesized  
192 that we should be able to detect this before a peak in mitochondrially-generated ROS. Indeed,  
193 following LPS treatment we saw that total ROS peaks within 30 minutes (black bars) whereas  
194 mitochondrial ROS (red bars) peaks at about 16 hours (**Fig. 5C**). Furthermore, the increase seen  
195 in total ROS was blocked with a NOX2 inhibitor (grey bars), suggesting that the ROS generated  
196 by NOX2 can activate ATM kinase (**Fig. 5C**). We tested ROS activation of ATM kinase in placental  
197 cells by generating ROS with hydrogen peroxide. We again saw an increase in ATM kinase  
198 amount as well as increased phosphorylation of a known ATM kinase target CHK2 [50] (**Fig. 5D**).  
199 We then tested the converse – whether scavenging ROS (with N-acetyl cysteine) would prevent  
200 LPS-stimulated phosphorylation of YME1L1 and found that such phosphorylation was indeed  
201 blocked (**Fig. 5E**). Taken together, these data suggest that ATM kinase is activated by NOX2-  
202 generated ROS and can phosphorylate and thereby stabilize YME1L1, which in turn reduces  
203 MNRR1 levels.

204         To assess whether ROS induced signaling was responsible for inflammation, we tested  
205 whether scavenging mitochondrial ROS or NOX2-mediated ROS would affect two markers of  
206 inflammation – *TNF $\alpha$*  (tumor necrosis factor- $\alpha$ ) and *PTGS2* (prostaglandin synthase 2; also  
207 cyclooxygenase-2). We found that scavenging mitochondrial ROS (using MitoTempo, a  
208 mitochondria-specific ROS scavenger [51]) could partially reduce an LPS-induced increase in  
209 *TNF $\alpha$*  and *PTGS2* transcript levels (**Fig. 5F**). The use of the NOX2 inhibitor, on the other hand,  
210 could completely protect the increase in the same markers (**Fig. 5G**), suggesting that  
211 mitochondrial ROS is downstream of the NOX2-induced cytoplasmic ROS and that scavenging  
212 mitochondrial ROS only partially inhibits inflammation.

213         To further investigate YME1L1 phosphorylation, we generated a non-phosphorylatable  
214 point mutation (T695A) at the predicted target, threonine 695 (**Supplementary Figure 4A**). We

215 tested the effect of this mutation in YME1L1-KO 293 cells by overexpressing this T695A mutant,  
216 WT, or PD-YME1L1. Doing so we found that the T695A mutation prevented the LPS-stimulated  
217 reduction in MNRR1 levels that is seen when the WT form is present (**Fig. 5H**), suggesting this  
218 phosphorylation is necessary for LPS-induced stabilization of YME1L1. Furthermore, this  
219 mutation behaves like PD-YME1L1 with respect to its known substrate STARD7 (**Fig. 5H**). The  
220 T695A mutation thus acts in a similar manner to PD-YME1L1. A second, control mutation, T656A,  
221 at a different threonine residue with a canonical ATM kinase recognition motif [52], does not  
222 prevent LPS-stimulated MNRR1 reduction (**Fig. 5H**), supporting the specificity of the T695  
223 phosphorylation site in response to LPS treatment.

224

225 **Novel TLR4-independent signaling pathway is responsible for MNRR1-dependent**  
226 **reduction in mitochondrial function in bacterial endotoxin treated placental cells *in vitro***

227 Canonical LPS signaling is initiated by binding to Toll Like Receptor 4 (TLR4) [53-56];  
228 therefore, we next asked if overexpression of TLR4 activates the NOX2-ATM-MNRR1 signaling  
229 pathway. We found that, although overexpression of TLR4 increases MNRR1 levels, LPS  
230 treatment reduces MNRR1 similarly to control cells (**Fig. 6A**). Since inflammation caused by LPS  
231 can occur either through MyD88-dependent signaling or MyD88-independent (TBK1-dependent)  
232 signaling [57-59] (**Fig. 6B**), we next assessed whether MNRR1 levels are reduced in mouse livers  
233 from WT or Myd88<sup>-/-</sup> mice challenged with LPS. We found that MNRR1 levels are reduced in both  
234 WT and Myd88<sup>-/-</sup> mice (**Fig. 6C**). Furthermore, examining activation of the kinase promoting the  
235 MyD88-independent immune response, we also found no change in TBK1 phosphorylation in  
236 HTR placental cells (**Supplementary Fig. 5A**). Taken together, these results eliminate the  
237 canonical TLR4 signaling pathway as the mediator of mitochondrial dysfunction.

238 We then hypothesized that TLR4 may directly interact with NOX2 to initiate this pathway,  
239 and hence tested MNRR1 levels in TLR4<sup>-/-</sup> mouse liver tissue lysates injected with PBS (control)  
240 or LPS. We found that MNRR1 levels are reduced also in TLR4<sup>-/-</sup> mouse livers challenged with

241 LPS (**Fig. 6D**). Besides MNRR1, we tested for other markers (NOX2 and ATM kinase) both in the  
242 LPS-injected mouse placentas (**Supplementary Fig. 5B**), where we originally found a reduction  
243 in MNRR1 (**Fig. 1A**), as well as in the TLR4<sup>-/-</sup> mouse liver tissue lysate (**Supplementary Fig. 5C**).  
244 We found the pathway to be active even in the animal samples, consistent with the results found  
245 in the human cell culture system (**Supplementary figure 4B and Fig. 5A**), confirming that the  
246 same pathway is active is the TLR4<sup>-/-</sup> animals. To verify that the TLR4-independent reduction in  
247 MNRR1 levels seen in the TLR4<sup>-/-</sup> animals is initiated by NOX2 activation, we used a NOX2  
248 inhibitor in TLR4<sup>-/-</sup> mouse macrophages [60] and found that the NOX2 inhibitor prevents LPS-  
249 induced reduction in MNRR1 (**Supplementary Fig. 5D**). Taken together, we conclude that LPS  
250 acts through a TLR4-independent pathway to activate ATM kinase to phosphorylate YME1L1 at  
251 Thr-656, stabilizing it and thereby reducing MNRR1 levels.

252

### 253 **MNRR1 functions as an anti-inflammatory effector via its nuclear function**

254 To confirm that MNRR1 is upstream of the inflammatory signaling we generated a  
255 MNRR1-depleted human placental cell line and assessed transcript levels of two inflammatory  
256 markers – phospho-JNK (**Supplementary Fig. 5E**) and *TNF $\alpha$*  (**Supplementary Fig. 5F**) – and  
257 found these to be increased. Since MNRR1 is present in both the nucleus and the mitochondria  
258 and has a different function in each [27], we investigated the compartment-specific effect of LPS  
259 on MNRR1 by assessing OCR and the stimulation of inflammation-associated genes *TNF $\alpha$*  and  
260 *PTGS2*. We found that LPS treatment increased the transcript levels of both these genes and that  
261 overexpression of either WT or the C-S mutant of MNRR1 that does not localize to mitochondria  
262 [27] can prevent this increase (**Figs. 7A, 7B**), as can the MNRR1 activator Nitazoxanide (N) (**Figs.**  
263 **7C, 7D**). To determine whether the anti-inflammatory role is due to nuclear function of MNRR1,  
264 we asked if overexpressing CHCHD4, which is required for MNRR1 import into the mitochondria  
265 [27], could prevent the LPS-induced deficit in oxygen consumption. We found that CHCHD4  
266 overexpression can increase oxygen consumption (**Supplementary Fig. 5G**), as also shown

267 previously [61], but that LPS-treatment reduces oxygen consumption to the same extent as seen  
268 in the absence of CHCHD4 overexpression, suggesting that specifically nuclear MNRR1 is  
269 required to prevent inflammation.

270 To probe the mechanism by which nuclear MNRR1 can inhibit inflammation, we looked to  
271 see if any regulatory components of the NF- $\kappa$ B signaling pathway are transcriptionally regulated  
272 by MNRR1. We found that I- $\kappa$ B $\alpha$  (*NFKBIA*), a regulator that binds NF- $\kappa$ B and retains it in the  
273 cytoplasm [62], is transcriptionally activated by MNRR1 (**Fig. 7E**). Consistent with the prediction  
274 from RNA-sequencing, performed in HEK293 cells [63], we found in the placental cells that I- $\kappa$ B $\alpha$   
275 levels are reduced by LPS treatment (**Fig. 7F**), thereby allowing nuclear localization of NF- $\kappa$ B.  
276 Overexpression of MNRR1, however, can prevent these effects (**Fig. 7F**). These findings suggest  
277 that MNRR1 can act as an anti-inflammatory agent at least in part by preventing activation of NF-  
278  $\kappa$ B. Since one of the classic targets of NF- $\kappa$ B, COX-2, is required for induction of labor under  
279 physiological conditions [64, 65], MNRR1 expression may blunt the effects of inflammation by  
280 preventing nuclear translocation of NF- $\kappa$ B.

281



## 282 Discussion

283 Acute inflammation due to intra-amniotic infection is causally linked to spontaneous  
284 premature labor [66-69]. Mitochondria can serve as an early sensor of inflammatory stress [70-  
285 74]. Here, we show that MNRR1 is reduced by a post-translational mechanism in *in vivo* and *in*  
286 *vitro* models of placental inflammation, leading to the generation of mitochondrial ROS.  
287 Surprisingly, the mitochondrial ROS that is the source of inflammatory signaling in the placenta  
288 takes place via a TLR4-independent signaling pathway. This pathway is initiated by activation of  
289 ATM kinase via NOX2-dependent ROS, which in turn phosphorylates YME1L1, a protease that  
290 degrades MNRR1 in the mitochondria. Although ATM kinase is primarily activated in response to  
291 DNA damage [75], it was also shown be activated in response to LPS treatment in macrophage  
292 cells [76] although the downstream signaling targets were not identified. A recent study in a renal  
293 tubular epithelial cell model of LPS-induced sepsis [77] also identifies ATM activation as playing  
294 a key role in inflammation and autophagy activation. ATM kinase is localized to mitochondria [78],  
295 more specifically to the inner mitochondrial membrane [79], the same sub-mitochondrial  
296 compartment that harbors YME1L1 [80, 81]. YME1L1, although embedded in the inner  
297 membrane, exposes a large catalytic domain facing the IMS [80]. We showed that ATM-mediated  
298 threonine phosphorylation of YME1L1 can enhance its effective activity, resulting in faster  
299 turnover of MNRR1 in the mitochondria. Depletion of MNRR1 results in reduced oxygen  
300 consumption, reduced ATP levels, and increased ROS. These changes activate an irreversible  
301 and self-amplifying inflammatory signaling cascade that may disrupt signaling at the fetal-  
302 maternal interface.

303 MNRR1 has previously been associated with several diseases both in terms of altered  
304 expression and through mutations. Depleted MNRR1 protein levels have been found in an *in vivo*  
305 model for juvenile Niemann Pick type C disease [82] and *in vitro* model for MELAS (Mitochondrial  
306 Encephalomyopathy Lactic Acidosis and Stroke-like episodes) syndrome [32]. Mutations in  
307 MNRR1 have been associated with a number of neurodegenerative diseases such as Parkinson's

308 [83-85], Alzheimer's [86, 87], and Charcot-Marie-Tooth disease type 1A [28]. Of note, MELAS,  
309 caused by a mtDNA mutation in the mitochondrial tRNA<sup>Leu(UUR)</sup> gene (m.3243A > G), has been  
310 associated with spontaneous preterm birth [88, 89] and increased incidence of preeclampsia and  
311 gestational diabetes mellitus [88]. We have recently shown by overexpression of MNRR1 that  
312 oxygen consumption and other deficits associated with MELAS can be rescued in a cell culture  
313 model for the disease [32]. MNRR1 activation, either by overexpression or, more interestingly, by  
314 using a chemical activator, can thus provide multiple benefits that protect placental mitochondria  
315 and reduce inflammation.

316 MNRR1 is known to function in both the nucleus and the mitochondria [26-29] and as a  
317 nuclear transactivator can promote its own transcription [27]. Although we have focused here on  
318 the consequences of mitochondrial depletion, the rescue by pharmacological activation of  
319 transcription (**Fig. 1F**) and by overexpression of MNRR1 that cannot enter the mitochondria (**Figs.**  
320 **7A, 7B**) suggests that activating its nuclear function could suffice to prevent placental damage. In  
321 addition to activating itself, MNRR1 is a transcriptional activator for ROS scavenging enzymes  
322 such as *SOD2* (superoxide dismutase) and *GPX* (glutathione peroxidase) [27] and also is a  
323 regulator of mitophagy genes such as *ATG7* and *PARK2* (Parkin) [32]. A similar conclusion about  
324 the importance of its nuclear function was reached in a MELAS model [32]. Besides MNRR1's  
325 ability to regulate genes involved in ROS scavenging, we now identify another transcriptional  
326 target – I $\kappa$ B $\alpha$  – that can contribute to its anti-inflammatory role via inhibition of NF- $\kappa$ B.

327 The novel NOX2/ATM kinase/YME1L1/MNRR1/COX-2 axis we have described provides  
328 insight into the mechanism by which placental inflammation can lead to preterm labor and birth  
329 (**Fig. 8**). There are multiple points at which we could modulate this pathway but activation of  
330 MNRR1 may be an ideal point to break the cycle of ROS-induced inflammation. COX-2 was  
331 initially considered an ideal target since pharmacological inhibition of COX-2 can prevent  
332 inflammation induced preterm labor [90] in mice. However, an offsetting consideration is that  
333 COX-2 is important in physiological labor and its loss can impair closure of the ductus arteriosus

334 [91, 92]. This temporally defined role of COX-2 [93] has led to concerns about using  
335 cyclooxygenase inhibitors in the clinic during pregnancy [94]. Another current treatment uses  
336 steroidal compounds in the antenatal period to prevent respiratory distress syndrome and  
337 mortality in anticipated cases of preterm birth [95]. However, steroids are not always useful and  
338 have been associated with deleterious effects both on the fetus such as cerebral palsy [96],  
339 microcephaly [97-99], lower birthweight [100-102], adrenal suppression [103], the development  
340 of impaired glucose tolerance and hypertension later in life [97, 104], and on the mother such as  
341 risk of infection [99], loss of glycemic control in diabetics [105, 106], suppression of the  
342 hypothalamic axis [107], and reduced fetal growth velocity [108]. Since the pro-inflammatory  
343 signaling proceeds through degradation of mitochondrial MNRR1 whereas its nuclear function is  
344 sufficient to rescue the effects of LPS, transcriptional activation of MNRR1 can provide a  
345 treatment option. In addition, the recent demonstration that MNRR1 activation may be able to  
346 augment or in some cases even replace steroids for respiratory distress syndrome [109] adds  
347 additional impetus for development of this targeted therapy.

348         In summary, we have identified a novel signaling axis by which inflammation induced by  
349 the bacterial mimetic LPS causes mitochondrial dysfunction. It does so by reducing the level of  
350 the bi-organellar regulator MNRR1 in response to phosphorylation and stabilization of IMS  
351 protease YME1L1, which turns over MNRR1. Phosphorylation is carried out by ATM kinase after  
352 activation by NOX2-produced ROS promoted by LPS. The mitochondrial ROS that stem from  
353 MNRR1 inhibition cause JNK phosphorylation and consequent activation of the cytokines TNF $\alpha$   
354 and cyclooxygenase 2.

355

## 356 **Experimental Procedures**

### 357 **Cell culture and reagents**

358 Cell lines: All cell media were supplemented with 10% fetal bovine serum (FBS) (Sigma  
359 Aldrich, St. Louis, MO) plus Penicillin Streptomycin (HyClone, Logan, UT). HTR8/SVNeo (HTR),  
360 RAW, and JAR cells were cultured in Roswell Park Memorial Institute Medium (RPMI) (HyClone,  
361 Logan, UT). The BeWO cells were grown in F12K media (Gibco, Waltham, MA). HEK293 cells  
362 were grown in Dulbecco's modified Eagle's medium (without pyruvate). The WT and TLR4<sup>-/-</sup>  
363 immortalized macrophages and HepG2 cells, were grown in Dulbecco's modified Eagle's medium  
364 (with 1 mM pyruvate). YME1L1 knockout-HEK293 cells were grown in Dulbecco's modified  
365 Eagle's medium (with 1 mM pyruvate) supplemented with non-essential amino acids (Gibco).

366 Chemicals: Nitazoxanide and Clotrimazole were obtained from Selleckchem (Houston,  
367 TX) and solubilized in DMSO (used as vehicle control in all experiments with these compounds).  
368 Ultrapure LPS for cell culture experiments (Lipopolysaccharide from *Escherichia coli* 0111:B4)  
369 was purchased from Invivogen. NOX2 inhibitor GSK2795039 was obtained from MedChem  
370 Express (Monmouth Junction, NJ). ATM inhibitor KU-55933 was from Cell Signaling Technology.

371 Plasmids: The WT and protease dead (PD) YME1L1 plasmids were a kind gift from Dr.  
372 Thomas Langer, University of Cologne, DE. The *MNRR1* promoter luciferase reporter plasmid  
373 has been described previously [27]. The human TLR4 overexpression plasmid was purchased  
374 from Addgene (Cat. #13086). The T695A and T656A mutations were generated in WT-YME1L1  
375 plasmid via QuikChange Lightning Site-Directed Mutagenesis Kit (Agilent, Santa Clara, CA) and  
376 confirmed by sequencing. All the expression plasmids were purified using the EndoFree plasmid  
377 purification kit from Qiagen (Valencia, CA).

378

### 379 **Transient transfection of HTR cells**

380 HTR cells were transfected with the indicated plasmids using TransFast transfection  
381 reagent (Promega, Madison, WI) according to the manufacturer's protocol. A TransFast:DNA ratio

382 of 3:1 in serum and antibiotic free medium was used. Following incubation at room temperature  
383 for ~15 min, the cells were overlaid with the mixture. The plates were incubated for 1 h at 37 °C  
384 followed by replacement with complete medium and further incubation for the indicated time.

385

### 386 **Real-time polymerase chain reaction**

387 Total cellular RNA was extracted from mouse placental tissue or HTR cells with an  
388 RNeasy Plus Mini Kit (Qiagen, Valencia, CA) according to the manufacturer's instructions.  
389 Complementary DNA (cDNA) was generated by reverse transcriptase polymerase chain reaction  
390 (PCR) using the ProtoScript® II First Strand cDNA Synthesis Kit (NEB, Ipswich, MA). Transcript  
391 levels were measured by real time PCR using SYBR green on an ABI 7500 system. Real-time  
392 analysis was performed by the  $\Delta\Delta^{Ct}$  method. The primer sequences used were as follows (F,  
393 forward; R, reverse): Mouse MNRR1: F- ATGGCCCAGATGGCTACC, R-  
394 CTGGTTCTGAGCACACTCCA; Mouse Actin: F- TCCTCCCTGGAGAAGAGCTA, R-  
395 ACGGATGTCAACGTCACACT; Human MNRR1: F- CACACATTGGGTCACGCCATTACT, R-  
396 TTCTGGGCACACTCCAGAACTGT; Human Actin: F- CATTAAGGAGAAGCTGTGCT, R-  
397 GTTGAAGGTAGTTTCGTGGA; Human YME1L1: F- TGAAGGGGTTTCTTTTGCCG, R-  
398 TCGCCTTAGGGAATCATTGGT, Human TNF $\alpha$ -F- TGTAGCAAACCCTCAAGCTG, R-  
399 GAGGTTGACCTTGGTCTGGT, Human PTGS2 F-ATGATGTTTGCATTCTTTGCCAG, R-  
400 CATCCTTGAAAAGGCGCAGTTTA

401

### 402 **Luciferase reporter assay**

403 Luciferase assays were performed with the dual-luciferase reporter assay kit (Promega,  
404 Madison, WI) per the manufacturer's instructions. Transfection efficiency was normalized with the  
405 co-transfected pRL-SV40 *Renilla* luciferase expression plasmid [26, 28, 29].

406

### 407 **Intact cellular oxygen consumption**

408 Cellular oxygen consumption was measured with a Seahorse XF<sup>e</sup>24 Bioanalyzer (Agilent,  
409 Santa Clara, CA). Cells were plated at a concentration of  $3 \times 10^4$  per well a day prior to treatment  
410 and basal oxygen consumption was measured 24 h after treatments as described [28, 29].

411

#### 412 **ATP measurements**

413  $7.5 \times 10^4$  HTR cells per well were plated on a 96-well plate a day prior to treatment and  
414 ATP levels were measured using Cell Titer Glo (Promega, Madison, WI) according to  
415 manufacturer's instructions.

416

#### 417 **ROS measurements**

418 Total cellular ROS measurements were performed with CM-H<sub>2</sub>DCFDA (Life Technologies,  
419 Grand Island, NY). Cells were distributed into 96-well plates at  $7.5 \times 10^4$  cells per well and  
420 incubated for 24 h or as described in specific experiments. Cells were then treated with 10  $\mu$ M  
421 CM-H<sub>2</sub>DCFDA in serum- and antibiotic-free medium for 1 h. Cells were washed twice in  
422 phosphate buffered saline and analyzed for fluorescence on a Gen5 Microplate Reader (BioTek  
423 Inc, Winooski, VT). For mitochondrial ROS measurements, the cells were treated as above but  
424 with 5  $\mu$ M Mitosox Red (Life Technologies) for 30 min.

425

#### 426 **Confocal microscopy**

427 Confocal microscopy was performed as described [28, 29]. For mouse placental tissue  
428 sections, 8-10  $\mu$ m thick transverse sections were stained with anti-MNRR1 antibody (1:50  
429 Proteintech Inc., Chicago, IL). The secondary antibody used was donkey anti-rabbit IgG Alexa  
430 594 (1:200, Jackson Labs, Bar Harbor, ME). These were imaged with a Leica TCS SP5  
431 microscope and images were combined in Photoshop. Co-localization (overlap of the two  
432 fluorophores) and intensity (number of pixels per unit area) were quantitated using Volocity image  
433 analysis software (Perkin Elmer, Waltham, MA). For human placental cells, staining was

434 performed with anti-MNRR1 (1:50 Proteintech Inc., Chicago, IL) conjugated to CoraLite-594 and  
435 anti-TOM20 conjugated to CoraLite-488 (1:200, Proteintech Inc., Chicago, IL).

436

### 437 **Mitochondria isolation**

438 Mitochondria were isolated from cells with a Mitochondrial Isolation Kit (Thermo Scientific,  
439 Rockford, IL) as described previously [28, 29]. The nuclear fraction was obtained by low-speed  
440 centrifugation and the mitochondrial fraction was obtained after high-speed centrifugation of the  
441 nuclear supernatant. Cross-contamination between the fractions was analyzed with  
442 compartment-specific antibodies.

443

### 444 **Immunoblotting and co-immunoprecipitation**

445 Immunoblotting on a PVDF membrane was performed as described previously [26, 27].  
446 Unless specified otherwise, primary antibodies were used at a concentration of 1:500 and  
447 secondary antibodies at a concentration of 1:5000. The MNRR1 (19424-1-AP), YME1L1 (11510-  
448 1-AP), DRBP76 (19887-1-AP), MTCO2 (55070-1-AP), STARD7 (156890-1-AP), NOX2 (19013-  
449 1-AP), RelA/p65 (10745-1-AP), and TLR4 (19811-1-AP) (used for mouse tissue) antibodies were  
450 purchased from Proteintech Inc. (Chicago, IL). The GAPDH (8884), phospho-JNK (4668), total  
451 JNK (9252), anti-phosphothreonine (9386), ATM (2873), CHK2 (6334), phosphothreonine 68-  
452 CHK2 (2197), I- $\kappa$ B $\alpha$  (4814), phospho-TBK1 (5483), and total TBK1 (3504) antibodies were  
453 purchased from Cell Signaling Technology Inc (Beverly, MA). The Lamin (sc-6217) and TLR4 (sc-  
454 293072) antibodies (used for human cell lines) were purchased from Santa Cruz Biotechnology  
455 (SCBT), Inc, Dallas, TX). The FLAG antibody (A8592) was purchased from Sigma. Co-  
456 immunoprecipitation experiments were performed according to the supplier's protocol by  
457 incubating the antibody-adsorbed beads overnight at 4 °C. For co-immunoprecipitation,  
458 phosphothreonine antibody (Cell Signaling) conjugated to L-agarose beads (sc-2336, SCBT) or

459 YME1L1 antibody (Proteintech) conjugated to protein A/G-agarose beads (sc-2003, SCBT) were  
460 used.

461

## 462 **Statistical analysis**

463 Statistical analyses were performed with MSTAT version 6.1.1 (N. Drinkwater, University  
464 of Wisconsin, Madison, WI). The two-sided Wilcoxon rank-sum test was applied to determine  
465 statistical significance for  $p$ -values. Data were considered statistically significant with  $p < 0.05$ .  
466 Error bars represent standard error of mean.

467

## 468 **Animal experiments and injections**

469 Mouse placental samples: Samples were obtained using the intraperitoneal injection LPS  
470 (*Escherichia coli* O111:B4; Sigma) model that results in 100% preterm labor/birth [40]. Briefly,  
471 pregnant B6 mice were intraperitoneally injected on 16.5 dpc with 15  $\mu$ g of LPS in 200  $\mu$ L of PBS  
472 using a 26-gauge needle. Controls were injected with 200  $\mu$ L of PBS. Mice were monitored via  
473 video recording using an infrared camera to determine gestational age and the rate of preterm  
474 labor. Placentas were collected before preterm birth (12-13 h after LPS injection).

475 Mouse liver samples for Myd88<sup>-/-</sup> and TLR4<sup>-/-</sup>: Mice of approximately 3-months were  
476 injected intraperitoneally with LPS (*Escherichia coli* O111:B4, Sigma, 2  $\mu$ g/gm body weight) or  
477 PBS for 18 h [110]. Liver tissues collected from the mice after LPS treatment were homogenized  
478 in NP-40 lysis buffer in the presence of proteasome inhibitors. Lipid contents were briefly  
479 extracted from the liver tissue lysates by the SDS buffer, and the protein supernatants were  
480 denatured for Western blot analyses [111].

481 All animal procedures were approved by the Institutional Animal Care and Use Committee  
482 (IACUC) at Wayne State University under Protocol No. A-07-03-15.

483

## 484 **Materials and data availability**



485           The reagents and data from the current study are available from the corresponding  
486 authors on reasonable request.

#### 487 **Acknowledgements**

488           We thank Dr. Thomas Langer (University of Cologne, Cologne, Germany) for providing the  
489 YME1L1 plasmids, Dr. Kezhong Zhang (Wayne State University, Detroit, MI, US) for providing  
490 MyD88<sup>-/-</sup> tissues and TLR4<sup>-/-</sup> tissue lysates, and Dr. Douglas Golenbock (University of  
491 Massachusetts Medical School, Worcester, MA, US) for providing the TLR4<sup>+/+</sup> and TLR4<sup>-/-</sup> mouse  
492 macrophages. This work was supported by the Perinatology Research Branch, Division of  
493 Obstetrics and Maternal-Fetal Medicine, Division of Intramural Research, *Eunice Kennedy*  
494 *Shriver* National Institute of Child Health and Human Development, National Institutes of Health,  
495 U.S. Department of Health and Human Services (NICHD/NIH/DHHS); and, in part, with Federal  
496 funds from NICHD/NIH/DHHS under Contract No. HHSN275201300006C. Dr. Romero has  
497 contributed to this work as part of his official duties as an employee of the United States Federal  
498 Government. Opinions, interpretations, conclusions, and recommendations are those of the  
499 authors and are not necessarily endorsed by the NIH.

#### 500 **Conflicts of interest**

501           The authors declare no competing financial interests.

#### 502 **Author contributions**

503           NP performed all experiments, YK helped with generation of Western blots, NGL provided  
504 the human and mouse placental tissue samples. NP, SA, and LIG analyzed the results and  
505 participated in experimental design. YX, AF performed the screen to identify MNRR1 activators  
506 and inhibitors. NP and LIG wrote the manuscript. All authors reviewed the manuscript.

507

508

509 **Figure legends**

510

511 **Figure 1: LPS decreases MNRR1 levels and impairs mitochondrial function in**

512 **human placental cells, defects that can be rescued by increasing MNRR1 expression. All**

513 LPS treatments in cultures cells are at 500 ng/mL for 24 h unless indicated otherwise. In all

514 figures: \*,  $p < 0.05$ ; \*\*,  $p < 0.005$ . **(A)** Intact cellular oxygen consumption in the HTR cells treated

515 with control (water) or LPS. Data are represented as oxygen consumption relative to control set

516 to 100%. **(B)** Equal numbers of HTR cells were plated in a 96-well plate and ATP levels were

517 measured as in Experimental Procedures. **(C)** HTR cells were treated with control (water) or LPS

518 and ROS levels were measured using CM-H<sub>2</sub>DCFDA (total, Ex: 485 nm/Em: 527 nm) or MitoSOX

519 Red (mitochondrial, Ex: 510 nm/ Em: 580 nm). **(D)** Intact cellular oxygen consumption in HTR

520 cells overexpressing EV or MNRR1 and treated with control or LPS. Data are represented as

521 oxygen consumption relative to EV-control set to 100%. **(E) Left**, Equal amounts of HTR cells

522 treated with control or LPS were separated on an SDS-PAGE gel and probed for MNRR1,

523 phospho-JNK, and total JNK levels. Actin was probed as loading control. *Right*, The graph

524 represents MNRR1 levels relative to Actin. **(F) Left**, Intact cellular oxygen consumption in HTR

525 cells treated with Vehicle (DMSO), MNRR1 inhibitor (Clotrimazole (C), 10  $\mu$ M), or MNRR1

526 activator (Nitazoxanide (N), 10  $\mu$ M) with control (water) or LPS (500 ng/mL) for 24 h. Data are

527 expressed relative to EV-control set to 100%. *Right*, Pooled lysates from OCR measurement were

528 separated on an SDS-PAGE gel and probed for MNRR1, phospho-JNK, and total JNK levels.

529 Actin was probed as a loading control.

530

531

532 **Figure 2: MNRR1 protein levels are reduced *in vivo* in placental inflammation. (A)**

533 *Left*, Placental lysates from control (PBS) versus LPS (intraperitoneally) injected mice were

534 separated on an SDS-PAGE gel and probed for MNRR1 levels. Actin was used as a loading

535 control. *Right*, MNRR1 levels relative to Actin with one point for each animal. **(B)** *Left*, Placental  
536 tissue sections from control (PBS) versus LPS injected mice analyzed using immunofluorescence  
537 staining. *Right*, Relative MNRR1 fluorescence is shown. **(C)** Equal amounts of human placental  
538 lysates from an individual without inflammation and one with systemic inflammation were  
539 separated on SDS-PAGE gel and probed for MNRR1. Actin was probed as a loading control.

540

541 **Figure 3: Compartment-specific reduction in MNRR1 levels in human placental cells**  
542 **treated with LPS is mediated by YME1L1 protease.** **(A)** Equal amounts HTR cell nuclear and  
543 mitochondrial fractions were separated on an SDS-PAGE gel and probed for MNRR1. DRBP76  
544 and MTCO2 were probed to assess purity of fractions. **(B)** HTR cells were treated with control or  
545 LPS and immunostained for MNRR1 (red fluorescence). DAPI (blue fluorescence) was stained  
546 as a nuclear marker and TOM20 (green fluorescence) as a mitochondrial marker. *Below*, The  
547 graph represents MNRR1 levels relative to a compartment-specific control for each treatment. **(C)**  
548 *Left*, Equal amounts of HTR cells treated with control or LPS were separated on an SDS-PAGE  
549 gel and probed for YME1L1. Actin was probed as loading control. *Right*, The graph represents  
550 YME1L1 levels relative to GAPDH. **(D)** HTR cells overexpressing either an empty vector (EV) or  
551 a protease-dead (PD) mutant of YME1L1. Cells were treated with control or LPS. Equal amounts  
552 of cell lysates were separated on an SDS-PAGE gel and probed for MNRR1 and STARD7.  
553 Tubulin was probed as loading control.

554

555 **Figure 4: LPS treatment of placental cells increases the stability of YME1L1 via**  
556 **threonine phosphorylation by ATM kinase.** **(A)** Equal numbers of HTR cells were plated on a  
557 6-well plate and treated with control or LPS and 100 µg/mL cycloheximide for the durations shown.  
558 Equal amounts of cell lysates were separated on an SDS-PAGE gel and probed for YME1L1.  
559 Actin was probed as loading control. **(B)** HTR cells were treated with vehicle or LPS and equal  
560 amounts of whole cell lysates were used for immunoprecipitation using a phospho-threonine

561 antibody. Equal amounts IP eluates were then probed for YME1L1. Antibody heavy chain (p-Thr)  
562 was probed to assess loading. **(C)** HTR cells were treated with control, LPS, or LPS+ATM inhibitor  
563 (1  $\mu$ M) for 24 h. Equal amounts of whole cell lysates were used for immunoprecipitation by  
564 phospho-threonine antibody. Equal amounts IP eluates were probed for YME1L1 antibody and  
565 heavy chain (p-Thr) was probed to assess loading. **(D)** Graph for YME1L1 levels from HTR cells  
566 were treated with control, LPS, or LPS+ATM inhibitor (1  $\mu$ M) and 100  $\mu$ g/mL cycloheximide for  
567 the durations shown in (A). The amount relative to time = 0 was graphed.

568

569 **Figure 5: ROS generated by NOX2 activates ATM kinase in LPS treated placental**  
570 **cells. (A) Left**, Equal amounts of HTR cells treated with control (water) or LPS were separated  
571 on an SDS-PAGE gel and probed for NOX2. Tubulin was probed as loading control. *Right*, NOX2  
572 levels relative to tubulin are shown. **(B) Left**, Equal amounts of HTR cells were treated for 24 h  
573 with control (water) or LPS and, for 2<sup>nd</sup> blot, 25  $\mu$ M NOX2 inhibitor (using DMSO in control); lysates  
574 were separated on an SDS-PAGE gel and probed for NOX2. Actin was probed as loading control.  
575 *Right*, Relative MNRR1 levels are shown for each lane. **(C)** HTR cells were treated with control  
576 (water) or LPS for the times shown and ROS levels were measured as in Figure 1C. Total ROS,  
577 black; mitochondrial ROS, red; total ROS with ATM inhibitor, grey. **(D)** Equal amounts of HTR  
578 cells were treated with control (water) or hydrogen peroxide (H<sub>2</sub>O<sub>2</sub>) for 16 h and lysates separated  
579 on an SDS-PAGE gel and probed for p-CHK2, total CHK2, and ATM kinase. Actin was probed as  
580 loading control. **(E) Left**, Equal amounts of HTR cells treated with control (water) or LPS with  
581 either Vehicle (DMSO) or 100  $\mu$ M N-acetyl cysteine for 24 h were separated on an SDS-PAGE  
582 gel and probed for YME1L1. Actin was probed as loading control. *Right*, Relative YME1L1 levels  
583 are shown for each condition. **(F)** *TNF $\alpha$*  and *PTGS2* transcript levels relative to *Actin* were  
584 measured in HTR cells treated with Control (water), LPS, or LPS + 20  $\mu$ M MitoTempo. **(G)** *TNF $\alpha$*   
585 and *PTGS2* relative transcript levels in HTR cells treated with Control (DMSO), LPS (LPS+DMSO)  
586 or LPS + 25  $\mu$ M NOX2 inhibitor.

587

588 **Figure 6: Novel TLR4-independent signaling pathway is responsible for MNRR1-**  
589 **dependent reduction in LPS treated placental cells. (A)** Equal amounts of HTR cells  
590 overexpressing EV or TLR4 were treated or not with LPS, then lysates were separated on an  
591 SDS-PAGE gel and probed for MNRR1, TLR4, YME1L1, and ATM kinase. GAPDH was probed  
592 as loading control. **(B)** Schematic diagram for the two arms of the TLR4 signaling pathway. **(C)**  
593 *Above*, Equal amount of tissue lysates (WT or MyD88<sup>-/-</sup>) from mouse liver injected intraperitoneally  
594 with PBS (control) or LPS were separated on an SDS-PAGE gel and probed for MNRR1. Actin  
595 was probed as loading control. *Below*, The graph shows relative MNRR1 levels. **(D)** *Above*, Equal  
596 amount of liver lysates from mice (WT or TLR4<sup>-/-</sup>) that had been injected intraperitoneally with  
597 PBS (control) or LPS were separated on an SDS-PAGE gel and probed for MNRR1. Actin was  
598 probed as loading control. *Below*, Graph shows relative MNRR1 levels on blots.

599

600 **Figure 7: MNRR1 functions as anti-inflammatory via its nuclear function.** Relative  
601 *TNFα* **(A)** and *PTGS2* **(B)** transcript levels in HTR cells treated with Control (EV), LPS (EV + LPS),  
602 WT-MNRR1 (WT + LPS), or C-S-MNRR1 (C-S + LPS). **(C)** Relative *TNFα* and **(D)** *PTGS2*  
603 transcript levels in HTR cells treated with Control (DMSO), LPS (LPS + DMSO), or LPS + 10 μM  
604 Nitazoxanide. **(E)** RNA-sequencing (HEK293 cells) showing that *NFKBIA* transcript levels are  
605 significantly reduced in MNRR1 knockout cells (KO) relative to wild type controls (WT). This  
606 reduction is rescued by overexpressing the transcriptionally active mutant of MNRR1 (K119R-  
607 MNRR1). **(F)** Nuclear NF-κB EV or MNRR1 and treated with control or LPS. Lamin was probed  
608 as a nuclear loading control. Whole cell lysates from the same experiment were probed for I-κB  
609 and FLAG (MNRR1) levels. Tubulin was probed as loading control.

610

611 **Figure 8: Model of MNRR1 action to suppress inflammation.**

612           **Supplementary Figure 1. (A)** Generality of LPS-stimulated reduction of MNRR1 levels  
613 by western analysis of lysates of various cell lines treated with control or LPS, then probed for  
614 MNRR1 and labeled loading control. *MNRR1* transcript levels are shown relative to *Actin* in mouse  
615 placental tissues **(B)**, and HTR cells **(C)**. **(D)** Transcript levels of *MNRR1*-luciferase reporter in  
616 HTR cells.

617  
618           **Supplementary Figure 2. (A)** Results of screen of 2400 FDA-approved drugs identified  
619 to transcriptionally activate (>1), inhibit (<1) or not affect (=1) MNRR1. Each circle represents one  
620 drug and the MNRR1 activator (Nitazoxanide (N), green) and MNRR1 inhibitor (Clotrimazole (C),  
621 red) have been highlighted. **(B)** Intact cellular oxygen consumption in HTR cells treated as  
622 described in the scheme below.

623  
624           **Supplementary Figure 3. (A)** Equal amounts of WT or *YME1L1*<sup>-/-</sup> cells treated with control  
625 or LPS (1 µg/mL) for 24 h were separated on an SDS-PAGE gel and probed for MNRR1, YME1L1,  
626 and OMA1. Actin was probed as loading control. **(B)** Equal amounts of HTR cells treated with  
627 control (water) or LPS (500 ng/mL) were separated on an SDS-PAGE gel and probed for OMA1.  
628 Actin was probed as loading control. **(C)** *YME1L1* transcript levels relative to *Actin* in HTR cells.  
629 **(D)** HTR cells were treated with control (water) or LPS. Equal amounts of whole cell lysates were  
630 used for immunoprecipitation with a YME1L1 antibody. Equal amounts IP eluates were probed  
631 for p-Serine, p-Threonine, or p-Tyrosine and YME1L1 was probed to assess loading. **(E)** Equal  
632 amounts of HTR cells overexpressing FLAG-tagged Y99E or C-S-MNRR1 were treated with  
633 control or LPS and lysates were separated on an SDS-PAGE gel and probed for FLAG. Actin was  
634 probed as loading control.

635  
636           **Supplementary Figure 4. (A)** Bioinformatic prediction from Scansite for kinases that  
637 might phosphorylate YME1L1. **(B)** Interaction of YME1L1 and ATM kinase. HTR cells were

638 treated with water or LPS. Equal amounts of whole cell lysates were used for immunoprecipitation  
639 with YME1L1 antibody. Equal amounts IP eluates were probed for ATM kinase and YME1L1, the  
640 latter to assess loading. Input lysates were also probed for ATM and YME1L1 and Actin was  
641 probed as loading control. **(C)** Interaction of YME1L1 and NEK6 kinase. HTR cells were treated  
642 with water or LPS. Equal amounts of whole cell lysates were used for immunoprecipitation using  
643 YME1L1 antibody. Equal amounts IP eluates were probed for ATM kinase, NEK6, and YME1L1  
644 was probed to assess loading. Input lysates were also probed for ATM, NEK6, and YME1L1 and  
645 actin was probed as loading control. **(D)** HTR cells were treated with vehicle, LPS, or LPS plus  
646 ATM inhibitor (1  $\mu$ M) for 24 h. Equal amounts of cell lysates were separated on an SDS-PAGE  
647 gel and probed for MNRR1 and STARD7. GAPDH was probed as loading control. **(E)** Data used  
648 for time course of YME1L1 turnover (Figure 4D). Equal numbers of HTR cells were plated on a  
649 6-well plate and treated with water or LPS and 100  $\mu$ g/mL cycloheximide for the times shown.  
650 Equal amounts cell lysates were separated on an SDS-PAGE gel and probed for YME1L1. Actin  
651 was probed as loading control.

652  
653 **Supplementary Figure 5. (A)** Equal amounts of HTR cells treated with water or LPS (500  
654 ng/mL) were separated on SDS-PAGE and probed for p-TBK1, total TBK1, and MNRR1. Actin  
655 was probed as loading control. **(B)** Placental lysates from control (PBS) versus LPS  
656 (intraperitoneally) injected mice were separated on an SDS-PAGE gel and probed for NOX2 and  
657 ATM kinase levels. Actin was used as a loading control. **(C)** Mouse liver lysates from TLR4<sup>-/-</sup>  
658 control (PBS) versus LPS injected mice were separated on an SDS-PAGE gel and probed for  
659 NOX2 and ATM kinase levels. Tubulin was probed as a loading control. **(D)** Equal amounts of WT  
660 or TLR4<sup>-/-</sup> mouse macrophage cells were treated with the NOX2 inhibitor with or without LPS (500  
661 ng/mL) and lysates were separated on SDS-PAGE and probed for MNRR1. Actin was probed as  
662 loading control. **(E) Left**, Intact cellular oxygen consumption in HTR cells overexpressing EV or  
663 CHCHD4 and treated with control (water) or LPS for 24 h. Data are expressed relative to EV-

664 control set to 100%. *Right*, Pooled lysates from OCR measurement were separated on an SDS-  
665 PAGE gel and probed for CHCHD4 levels. Actin was probed as a loading control.

666

667

668

669

670



671           **References**

672

- 673   1.    Lawn, J.E., et al., *Born too soon: accelerating actions for prevention and care of 15*  
674   *million newborns born too soon*. *Reprod Health*, 2013. **10 Suppl 1**: p. S6.
- 675   2.    Goldenberg, R.L., et al., *Epidemiology and causes of preterm birth*. *Lancet*, 2008.  
676   **371**(9606): p. 75-84.
- 677   3.    Romero, R., et al., *Inflammation in preterm and term labour and delivery*. *Semin Fetal*  
678   *Neonatal Med*, 2006. **11**(5): p. 317-26.
- 679   4.    Romero, R., et al., *Evidence that intra-amniotic infections are often the result of an*  
680   *ascending invasion - a molecular microbiological study*. *J Perinat Med*, 2019. **47**(9): p.  
681   915-931.
- 682   5.    Romero, R., et al., *Damage-associated molecular patterns (DAMPs) in preterm labor*  
683   *with intact membranes and preterm PROM: a study of the alarmin HMGB1*. *J Matern*  
684   *Fetal Neonatal Med*, 2011. **24**(12): p. 1444-55.
- 685   6.    West, A.P., et al., *TLR signalling augments macrophage bactericidal activity through*  
686   *mitochondrial ROS*. *Nature*, 2011. **472**(7344): p. 476-80.
- 687   7.    Kadam, L., et al., *Rosiglitazone blocks first trimester in-vitro placental injury caused by*  
688   *NF-kappaB-mediated inflammation*. *Sci Rep*, 2019. **9**(1): p. 2018.
- 689   8.    Lv, X., et al., *Propofol inhibits LPS-induced apoptosis in lung epithelial cell line, BEAS-*  
690   *2B*. *Biomed Pharmacother*, 2017. **87**: p. 180-187.
- 691   9.    Holland, O.J., et al., *Changes in mitochondrial respiration in the human placenta over*  
692   *gestation*. *Placenta*, 2017. **57**: p. 102-112.
- 693   10.   Sferruzzi-Perri, A.N., et al., *Placental mitochondria adapt developmentally and in*  
694   *response to hypoxia to support fetal growth*. *Proc Natl Acad Sci U S A*, 2019. **116**(5): p.  
695   1621-1626.
- 696   11.   Yung, H.W., et al., *Noncanonical mitochondrial unfolded protein response impairs*  
697   *placental oxidative phosphorylation in early-onset preeclampsia*. *Proc Natl Acad Sci U S*  
698   *A*, 2019. **116**(36): p. 18109-18118.
- 699   12.   Muralimanoharan, S., et al., *MIR-210 modulates mitochondrial respiration in placenta*  
700   *with preeclampsia*. *Placenta*, 2012. **33**(10): p. 816-23.
- 701   13.   Mando, C., et al., *OS048 Mitochondrial content and function in placental cells and*  
702   *tissues of preeclampsia and IUGR*. *Pregnancy Hypertens*, 2012. **2**(3): p. 203.
- 703   14.   Roberts, V.H., et al., *Effect of increasing maternal body mass index on oxidative and*  
704   *nitrate stress in the human placenta*. *Placenta*, 2009. **30**(2): p. 169-75.
- 705   15.   Mele, J., et al., *Impaired mitochondrial function in human placenta with increased*  
706   *maternal adiposity*. *Am J Physiol Endocrinol Metab*, 2014. **307**(5): p. E419-25.
- 707   16.   Wang, Y., M. Bucher, and L. Myatt, *Use of Glucose, Glutamine and Fatty Acids for*  
708   *Trophoblast Respiration in Lean, Obese and Gestational Diabetic Women*. *J Clin*  
709   *Endocrinol Metab*, 2019.
- 710   17.   Panfoli, I., et al., *Exosomes from human mesenchymal stem cells conduct aerobic*  
711   *metabolism in term and preterm newborn infants*. *FASEB J*, 2016. **30**(4): p. 1416-24.
- 712   18.   Chaiworapongsa, T., et al., *Pre-eclampsia part 1: current understanding of its*  
713   *pathophysiology*. *Nat Rev Nephrol*, 2014. **10**(8): p. 466-80.

- 714 19. Kim, C.J., et al., *Chronic inflammation of the placenta: definition, classification,*  
715 *pathogenesis, and clinical significance.* Am J Obstet Gynecol, 2015. **213**(4 Suppl): p.  
716 S53-69.
- 717 20. Reyes, L. and T.G. Golos, *Hofbauer Cells: Their Role in Healthy and Complicated*  
718 *Pregnancy.* Front Immunol, 2018. **9**: p. 2628.
- 719 21. Gomez-Lopez, N., et al., *Inflammasomes: Their Role in Normal and Complicated*  
720 *Pregnancies.* J Immunol, 2019. **203**(11): p. 2757-2769.
- 721 22. Miller, D., et al., *Cellular immune responses in the pathophysiology of preeclampsia.* J  
722 Leukoc Biol, 2021.
- 723 23. Myatt, L., S. Muralimanoharan, and A. Maloyan, *Effect of preeclampsia on placental*  
724 *function: influence of sexual dimorphism, microRNA's and mitochondria.* Adv Exp Med  
725 Biol, 2014. **814**: p. 133-46.
- 726 24. Myatt, L. and A. Maloyan, *Obesity and Placental Function.* Semin Reprod Med, 2016.  
727 **34**(1): p. 42-9.
- 728 25. Myatt, L., *Review: Reactive oxygen and nitrogen species and functional adaptation of the*  
729 *placenta.* Placenta, 2010. **31 Suppl**: p. S66-9.
- 730 26. Aras, S., et al., *Oxygen-dependent expression of cytochrome c oxidase subunit 4-2 gene*  
731 *expression is mediated by transcription factors RBPJ, CXXC5 and CHCHD2.* Nucleic  
732 Acids Res, 2013. **41**(4): p. 2255-66.
- 733 27. Aras, S., et al., *MNRR1 (formerly CHCHD2) is a bi-organellar regulator of*  
734 *mitochondrial metabolism.* Mitochondrion, 2015. **20**: p. 43-51.
- 735 28. Aras, S., et al., *Abl2 kinase phosphorylates Bi-organellar regulator MNRR1 in*  
736 *mitochondria, stimulating respiration.* Biochim Biophys Acta Mol Cell Res, 2017.  
737 **1864**(2): p. 440-448.
- 738 29. Purandare, N., et al., *The cellular stress proteins CHCHD10 and MNRR1 (CHCHD2):*  
739 *Partners in mitochondrial and nuclear function and dysfunction.* J Biol Chem, 2018.  
740 **293**(17): p. 6517-6529.
- 741 30. Liu, Y., et al., *CHCHD2 inhibits apoptosis by interacting with Bcl-x L to regulate Bax*  
742 *activation.* Cell Death Differ, 2015. **22**(6): p. 1035-46.
- 743 31. Madrid, F.F., L.I. Grossman, and S. Aras, *Mitochondria Autoimmunity and MNRR1 in*  
744 *Breast Carcinogenesis: A Review.* J Cancer Immunol (Wilmington), 2020. **2**(4): p. 138-  
745 158.
- 746 32. Aras, S., et al., *Mitochondrial Nuclear Retrograde Regulator 1 (MNRR1) rescues the*  
747 *cellular phenotype of MELAS by inducing homeostatic mechanisms.* Proc Natl Acad Sci  
748 U S A, 2020. **117**(50): p. 32056-32065.
- 749 33. Stavru, F., et al., *Listeria monocytogenes transiently alters mitochondrial dynamics*  
750 *during infection.* Proc Natl Acad Sci U S A, 2011. **108**(9): p. 3612-7.
- 751 34. D'Souza, M.F., et al., *Physical and subjective evaluation of a three-detector (TRIAD 88)*  
752 *SPECT system.* Australas Phys Eng Sci Med, 1995. **18**(4): p. 185-96.
- 753 35. Nakahira, K., et al., *Autophagy proteins regulate innate immune responses by inhibiting*  
754 *the release of mitochondrial DNA mediated by the NALP3 inflammasome.* Nat Immunol,  
755 2011. **12**(3): p. 222-30.
- 756 36. Zhou, R., et al., *A role for mitochondria in NLRP3 inflammasome activation.* Nature,  
757 2011. **469**(7329): p. 221-5.
- 758 37. Wu, B., et al., *Luteolin attenuates sepsis-induced myocardial injury by enhancing*  
759 *autophagy in mice.* Int J Mol Med, 2020. **45**(5): p. 1477-1487.

- 760 38. Everts, B., et al., *Commitment to glycolysis sustains survival of NO-producing*  
761 *inflammatory dendritic cells*. Blood, 2012. **120**(7): p. 1422-31.
- 762 39. Park, S., et al., *SIRT1 Alleviates LPS-Induced IL-1beta Production by Suppressing*  
763 *NLRP3 Inflammasome Activation and ROS Production in Trophoblasts*. Cells, 2020.  
764 **9**(3).
- 765 40. Gomez-Lopez, N., et al., *Intra-amniotic administration of lipopolysaccharide induces*  
766 *spontaneous preterm labor and birth in the absence of a body temperature change*. J  
767 Matern Fetal Neonatal Med, 2018. **31**(4): p. 439-446.
- 768 41. Garcia-Flores, V., et al., *Inflammation-Induced Adverse Pregnancy and Neonatal*  
769 *Outcomes Can Be Improved by the Immunomodulatory Peptide Exendin-4*. Front  
770 Immunol, 2018. **9**: p. 1291.
- 771 42. Romero, R., et al., *Clinical chorioamnionitis at term IV: the maternal plasma cytokine*  
772 *profile*. J Perinat Med, 2016. **44**(1): p. 77-98.
- 773 43. Chen, Y.H., et al., *Zinc supplementation during pregnancy protects against*  
774 *lipopolysaccharide-induced fetal growth restriction and demise through its anti-*  
775 *inflammatory effect*. J Immunol, 2012. **189**(1): p. 454-63.
- 776 44. Amatuzzi, M.M. and R.F. Albuquerque, *[Pathologic synovial plica of the knee. Results of*  
777 *surgical treatment in 37 knees]*. Rev Hosp Clin Fac Med Sao Paulo, 1994. **49**(3): p. 104-  
778 6.
- 779 45. Liu, Y.T., et al., *Loss of CHCHD2 and CHCHD10 activates OMA1 peptidase to disrupt*  
780 *mitochondrial cristae phenocopying patient mutations*. Hum Mol Genet, 2020. **29**(9): p.  
781 1547-1567.
- 782 46. MacVicar, T., et al., *Lipid signalling drives proteolytic rewiring of mitochondria by*  
783 *YME1L*. Nature, 2019. **575**(7782): p. 361-365.
- 784 47. Saita, S., et al., *PARL partitions the lipid transfer protein STARD7 between the cytosol*  
785 *and mitochondria*. EMBO J, 2018. **37**(4).
- 786 48. Wu, Q., et al., *NOX2-dependent ATM kinase activation dictates pro-inflammatory*  
787 *macrophage phenotype and improves effectiveness to radiation therapy*. Cell Death  
788 Differ, 2017. **24**(9): p. 1632-1644.
- 789 49. Kim, Y.M., et al., *ROS-induced ROS release orchestrated by Nox4, Nox2, and*  
790 *mitochondria in VEGF signaling and angiogenesis*. Am J Physiol Cell Physiol, 2017.  
791 **312**(6): p. C749-C764.
- 792 50. Melchionna, R., et al., *Threonine 68 is required for radiation-induced phosphorylation*  
793 *and activation of Cds1*. Nat Cell Biol, 2000. **2**(10): p. 762-5.
- 794 51. Trnka, J., et al., *A mitochondria-targeted nitroxide is reduced to its hydroxylamine by*  
795 *ubiquinol in mitochondria*. Free Radic Biol Med, 2008. **44**(7): p. 1406-19.
- 796 52. Pines, A., et al., *Global phosphoproteome profiling reveals unanticipated networks*  
797 *responsive to cisplatin treatment of embryonic stem cells*. Mol Cell Biol, 2011. **31**(24): p.  
798 4964-77.
- 799 53. Poltorak, A., et al., *Defective LPS signaling in C3H/HeJ and C57BL/10ScCr mice:*  
800 *mutations in Tlr4 gene*. Science, 1998. **282**(5396): p. 2085-8.
- 801 54. Hoshino, K., et al., *Cutting edge: Toll-like receptor 4 (TLR4)-deficient mice are*  
802 *hyporesponsive to lipopolysaccharide: evidence for TLR4 as the Lps gene product*. J  
803 Immunol, 1999. **162**(7): p. 3749-52.

- 804 55. Coats, S.R., et al., *MD-2 mediates the ability of tetra-acylated and penta-acylated*  
805 *lipopolysaccharides to antagonize Escherichia coli lipopolysaccharide at the TLR4*  
806 *signaling complex*. J Immunol, 2005. **175**(7): p. 4490-8.
- 807 56. Murdock, J.L. and G. Nunez, *TLR4: The Winding Road to the Discovery of the LPS*  
808 *Receptor*. J Immunol, 2016. **197**(7): p. 2561-2.
- 809 57. Takeda, K. and S. Akira, *TLR signaling pathways*. Semin Immunol, 2004. **16**(1): p. 3-9.
- 810 58. Akira, S. and K. Takeda, *Toll-like receptor signalling*. Nat Rev Immunol, 2004. **4**(7): p.  
811 499-511.
- 812 59. Hoebe, K., et al., *TLR signaling pathways: opportunities for activation and blockade in*  
813 *pursuit of therapy*. Curr Pharm Des, 2006. **12**(32): p. 4123-34.
- 814 60. Andrade, W.A., et al., *Type I Interferon Induction by Neisseria gonorrhoeae: Dual*  
815 *Requirement of Cyclic GMP-AMP Synthase and Toll-like Receptor 4*. Cell Rep, 2016.  
816 **15**(11): p. 2438-48.
- 817 61. Yang, J., et al., *Human CHCHD4 mitochondrial proteins regulate cellular oxygen*  
818 *consumption rate and metabolism and provide a critical role in hypoxia signaling and*  
819 *tumor progression*. J Clin Invest, 2012. **122**(2): p. 600-11.
- 820 62. Haskill, S., et al., *Characterization of an immediate-early gene induced in adherent*  
821 *monocytes that encodes I kappa B-like activity*. Cell, 1991. **65**(7): p. 1281-9.
- 822 63. Aras, S., et al., *Mitochondrial autoimmunity and MNRR1 in breast carcinogenesis*. BMC  
823 Cancer, 2019. **19**(1): p. 411.
- 824 64. Bennett, P. and D. Slater, *COX-2 expression in labour*, in *Improved non-steroid anti-*  
825 *inflammatory drugs: COX-2 enzyme inhibitors*. 1996, Springer. p. 167-188.
- 826 65. Olson, D.M. and C. Ammann, *Role of the prostaglandins in labour and prostaglandin*  
827 *receptor inhibitors in the prevention of preterm labour*. Front Biosci, 2007. **12**: p. 1329-  
828 43.
- 829 66. Romero, R., et al., *The role of inflammation and infection in preterm birth*. Semin Reprod  
830 Med, 2007. **25**(1): p. 21-39.
- 831 67. Romero, R., S.K. Dey, and S.J. Fisher, *Preterm labor: one syndrome, many causes*.  
832 Science, 2014. **345**(6198): p. 760-5.
- 833 68. Cappelletti, M., et al., *Inflammation and preterm birth*. J Leukoc Biol, 2016. **99**(1): p. 67-  
834 78.
- 835 69. Boyle, A.K., et al., *Preterm birth: Inflammation, fetal injury and treatment strategies*. J  
836 Reprod Immunol, 2017. **119**: p. 62-66.
- 837 70. Tikou, V., M.W. Tan, and I. Dikic, *Mitochondrial Functions in Infection and Immunity*.  
838 Trends Cell Biol, 2020. **30**(4): p. 263-275.
- 839 71. Zhong, F., S. Liang, and Z. Zhong, *Emerging Role of Mitochondrial DNA as a Major*  
840 *Driver of Inflammation and Disease Progression*. Trends Immunol, 2019. **40**(12): p.  
841 1120-1133.
- 842 72. Vringer, E. and S.W.G. Tait, *Mitochondria and Inflammation: Cell Death Heats Up*.  
843 Front Cell Dev Biol, 2019. **7**: p. 100.
- 844 73. Lang, R.M., et al., *Role of the beta 2 adrenoceptor in mediating positive inotropic activity*  
845 *in the failing heart and its relation to the hemodynamic actions of dopexamine*  
846 *hydrochloride*. Am J Cardiol, 1988. **62**(5): p. 46C-52C.
- 847 74. Youle, R.J., *Mitochondria-Striking a balance between host and endosymbiont*. Science,  
848 2019. **365**(6454).



- 849 75. Lee, J.H. and T.T. Paull, *Activation and regulation of ATM kinase activity in response to*  
850 *DNA double-strand breaks*. *Oncogene*, 2007. **26**(56): p. 7741-8.
- 851 76. Weintz, G., et al., *The phosphoproteome of toll-like receptor-activated macrophages*.  
852 *Mol Syst Biol*, 2010. **6**: p. 371.
- 853 77. Zheng, C., et al., *Effect of ATM on inflammatory response and autophagy in renal*  
854 *tubular epithelial cells in LPS-induced septic AKI*. *Exp Ther Med*, 2019. **18**(6): p. 4707-  
855 4717.
- 856 78. Valentin-Vega, Y.A., et al., *Mitochondrial dysfunction in ataxia-telangiectasia*. *Blood*,  
857 2012. **119**(6): p. 1490-500.
- 858 79. Blignaut, M., et al., *Ataxia-Telangiectasia Mutated is located in cardiac mitochondria*  
859 *and impacts oxidative phosphorylation*. *Sci Rep*, 2019. **9**(1): p. 4782.
- 860 80. Leonhard, K., et al., *AAA proteases with catalytic sites on opposite membrane surfaces*  
861 *comprise a proteolytic system for the ATP-dependent degradation of inner membrane*  
862 *proteins in mitochondria*. *EMBO J*, 1996. **15**(16): p. 4218-29.
- 863 81. Shah, Z.H., et al., *The human homologue of the yeast mitochondrial AAA metalloprotease*  
864 *Yme1p complements a yeast yme1 disruptant*. *FEBS Lett*, 2000. **478**(3): p. 267-70.
- 865 82. Erickson, R.P., et al., *Decreased membrane cholesterol in liver mitochondria of the point*  
866 *mutation mouse model of juvenile Niemann-Pick C1, Npc1(nmf164)*. *Mitochondrion*,  
867 2020. **51**: p. 15-21.
- 868 83. Cornelissen, T., et al., *CHCHD2 harboring Parkinson's disease-linked T61I mutation*  
869 *precipitates inside mitochondria and induces precipitation of wild-type CHCHD2*. *Hum*  
870 *Mol Genet*, 2020. **29**(7): p. 1096-1106.
- 871 84. Ikeda, A., et al., *Mutations in CHCHD2 cause alpha-synuclein aggregation*. *Hum Mol*  
872 *Genet*, 2019. **28**(23): p. 3895-3911.
- 873 85. Funayama, M., et al., *CHCHD2 mutations in autosomal dominant late-onset Parkinson's*  
874 *disease: a genome-wide linkage and sequencing study*. *Lancet Neurol*, 2015. **14**(3): p.  
875 274-82.
- 876 86. Che, X.Q., et al., *Mutation Screening of the CHCHD2 Gene for Alzheimer's Disease and*  
877 *Frontotemporal Dementia in Chinese Mainland Population*. *J Alzheimers Dis*, 2018.  
878 **61**(4): p. 1283-1288.
- 879 87. Liu, X., et al., *Identification of CHCHD2 mutations in patients with Alzheimer's disease,*  
880 *amyotrophic lateral sclerosis and frontotemporal dementia in China*. *Mol Med Rep*,  
881 2018. **18**(1): p. 461-466.
- 882 88. de Laat, P., et al., *Obstetric complications in carriers of the m.3243A>G mutation, a*  
883 *retrospective cohort study on maternal and fetal outcome*. *Mitochondrion*, 2015. **25**: p.  
884 98-103.
- 885 89. Feeney, C.L., et al., *A case-comparison study of pregnant women with mitochondrial*  
886 *disease - what to expect?* *BJOG*, 2019. **126**(11): p. 1380-1389.
- 887 90. Gross, G., et al., *Inhibition of cyclooxygenase-2 prevents inflammation-mediated preterm*  
888 *labor in the mouse*. *Am J Physiol Regul Integr Comp Physiol*, 2000. **278**(6): p. R1415-  
889 23.
- 890 91. Reese, J., et al., *Inhibition of cyclooxygenase isoforms in late- but not midgestation*  
891 *decreases contractility of the ductus arteriosus and prevents postnatal closure in mice*.  
892 *Am J Physiol Regul Integr Comp Physiol*, 2006. **291**(6): p. R1717-1723.

- 893 92. Loftin, C.D., et al., *Failure of ductus arteriosus closure and remodeling in neonatal mice*  
894 *deficient in cyclooxygenase-1 and cyclooxygenase-2*. Proc Natl Acad Sci U S A, 2001.  
895 **98**(3): p. 1059-64.
- 896 93. Baruzzi, R.G., N. Abdala, and F.L. Black, *Measles and measles vaccination in isolated*  
897 *Amerindian tribes. II. The 1978/79 Xingu epidemic*. Trop Geogr Med, 1982. **34**(1): p. 7-  
898 12.
- 899 94. Corff, K.E. and K.C. Sekar, *Clinical considerations for the pharmacologic management*  
900 *of patent ductus arteriosus with cyclooxygenase inhibitors in premature infants*. J Pediatr  
901 Pharmacol Ther, 2007. **12**(3): p. 147-57.
- 902 95. Briceno-Perez, C., E. Reyna-Villasmil, and P. Vigil-De-Gracia, *Antenatal corticosteroid*  
903 *therapy: Historical and scientific basis to improve preterm birth management*. Eur J  
904 Obstet Gynecol Reprod Biol, 2019. **234**: p. 32-37.
- 905 96. Wapner, R.J., et al., *Long-term outcomes after repeat doses of antenatal corticosteroids*.  
906 N Engl J Med, 2007. **357**(12): p. 1190-8.
- 907 97. Carson, R., et al., *Effects of antenatal glucocorticoids on the developing brain*. Steroids,  
908 2016. **114**: p. 25-32.
- 909 98. Huang, W.L., et al., *Effect of corticosteroids on brain growth in fetal sheep*. Obstet  
910 Gynecol, 1999. **94**(2): p. 213-8.
- 911 99. Abbasi, S., et al., *Effect of single versus multiple courses of antenatal corticosteroids on*  
912 *maternal and neonatal outcome*. Am J Obstet Gynecol, 2000. **182**(5): p. 1243-9.
- 913 100. French, N.P., et al., *Repeated antenatal corticosteroids: size at birth and subsequent*  
914 *development*. Am J Obstet Gynecol, 1999. **180**(1 Pt 1): p. 114-21.
- 915 101. Thorp, J.A., et al., *Does antenatal corticosteroid therapy affect birth weight and head*  
916 *circumference?* Obstet Gynecol, 2002. **99**(1): p. 101-8.
- 917 102. Bloom, S.L., et al., *Antenatal dexamethasone and decreased birth weight*. Obstet  
918 Gynecol, 2001. **97**(4): p. 485-90.
- 919 103. Banks, B.A., et al., *Multiple courses of antenatal corticosteroids and outcome of*  
920 *premature neonates*. North American Thyrotropin-Releasing Hormone Study Group. Am  
921 J Obstet Gynecol, 1999. **181**(3): p. 709-17.
- 922 104. Seckl, J.R., M. Cleasby, and M.J. Nyirenda, *Glucocorticoids, 11beta-hydroxysteroid*  
923 *dehydrogenase, and fetal programming*. Kidney Int, 2000. **57**(4): p. 1412-7.
- 924 105. Battarbee, A.N., et al., *Practice Variation in Antenatal Steroid Administration for*  
925 *Anticipated Late Preterm Birth: A Physician Survey*. Am J Perinatol, 2019. **36**(2): p. 200-  
926 204.
- 927 106. Battarbee, A.N., S. Aliaga, and K.A. Boggess, *Management of diabetic women with*  
928 *threatened preterm birth: a survey of Maternal-Fetal Medicine providers*. J Matern Fetal  
929 Neonatal Med, 2019: p. 1-9.
- 930 107. McKenna, D.S., et al., *The effects of repeat doses of antenatal corticosteroids on*  
931 *maternal adrenal function*. Am J Obstet Gynecol, 2000. **183**(3): p. 669-73.
- 932 108. Rizzo, G., et al., *Administration of antenatal corticosteroid is associated with reduced*  
933 *fetal growth velocity: a longitudinal study*. J Matern Fetal Neonatal Med, 2020: p. 1-6.
- 934 109. Purandare, N., et al., *Molecular mechanisms regulating lysophosphatidylcholine*  
935 *acyltransferase 1 (LPCAT1) in human pregnancy*. Placenta, 2021. **106**: p. 40-48.
- 936 110. Dandekar, A., et al., *Toll-like Receptor (TLR) Signaling Interacts with CREBH to*  
937 *Modulate High-density Lipoprotein (HDL) in Response to Bacterial Endotoxin*. J Biol  
938 Chem, 2016. **291**(44): p. 23149-23158.

- 939 111. Zhang, K., et al., *Endoplasmic reticulum stress activates cleavage of CREBH to induce a*  
940 *systemic inflammatory response*. *Cell*, 2006. **124**(3): p. 587-99.  
941

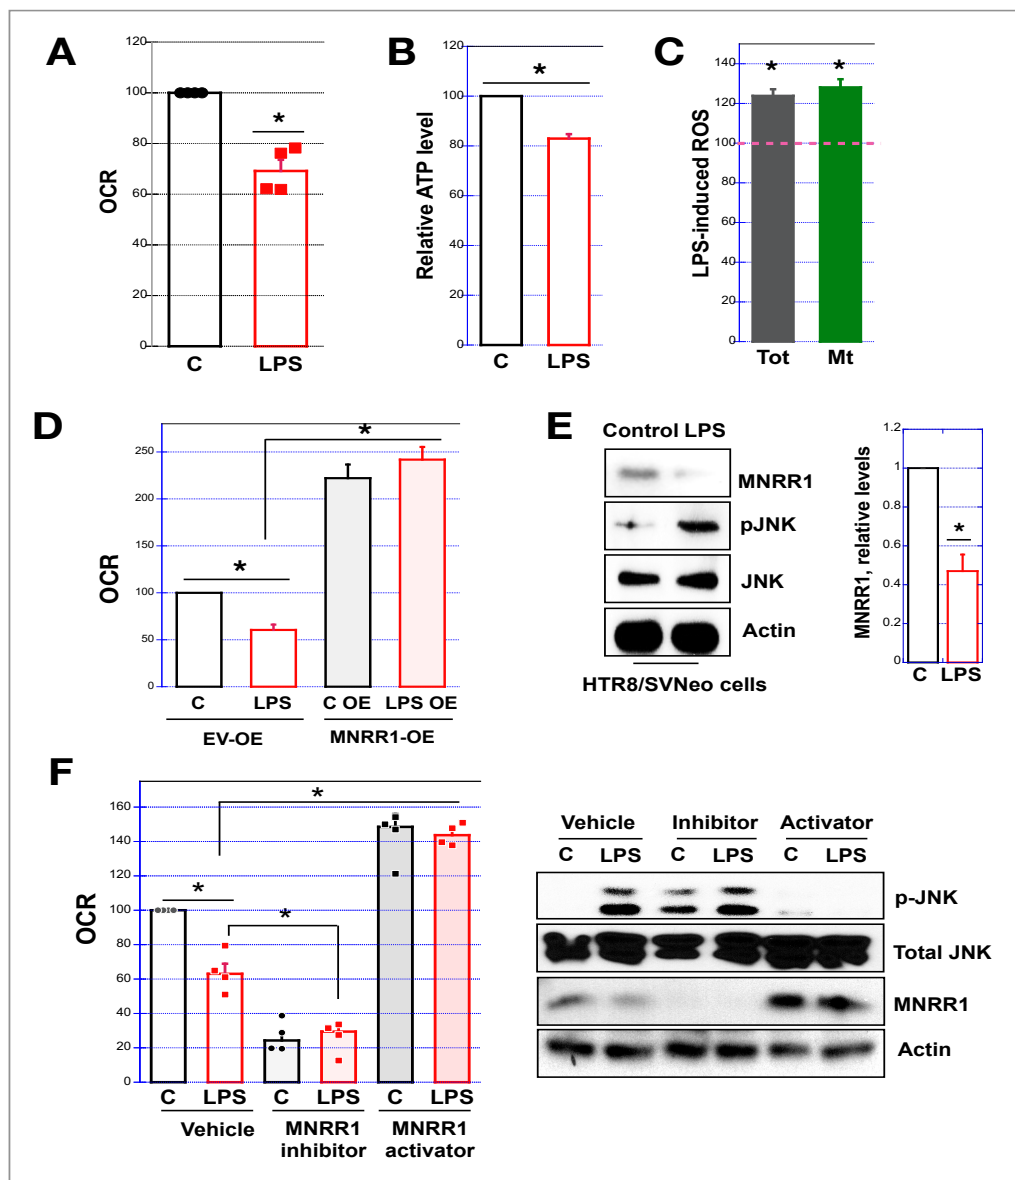

**Figure 1: LPS decreases MNRR1 levels and impairs mitochondrial function in human placental cells, defects that can be rescued by increasing MNRR1 expression.** All LPS treatments in cultures cells are at 500 ng/mL for 24 h unless indicated otherwise. In all figures: \*,  $p < 0.05$ ; \*\*,  $p < 0.005$ . **(A)** Intact cellular oxygen consumption in the HTR cells treated with control (water) or LPS. Data are represented as oxygen consumption relative to control set to 100%. **(B)** Equal numbers of HTR cells were plated in a 96-well plate and ATP levels were measured as in Experimental Procedures. **(C)** HTR cells were treated with control (water) or LPS and ROS levels were measured using CM-H<sub>2</sub>DCFDA (total, Ex: 485 nm/Em: 527 nm) or MitoSOX Red (mitochondrial, Ex: 510 nm/ Em: 580 nm). **(D)** Intact cellular oxygen consumption in HTR cells overexpressing EV or MNRR1 and treated with control or LPS. Data are represented as oxygen consumption relative to EV-control set to 100%. **(E) Left**, Equal amounts of HTR cells treated with control or LPS were separated on an SDS-PAGE gel and probed for MNRR1, phospho-JNK, and total JNK levels. Actin was probed as loading control. **Right**, The graph represents MNRR1 levels relative to Actin. **(F) Left**, Intact cellular oxygen consumption in HTR cells treated with Vehicle (DMSO), MNRR1 inhibitor (Clotrimazole (C), 10  $\mu$ M), or MNRR1 activator (Nitazoxanide (N), 10  $\mu$ M) with control (water) or LPS (500 ng/mL) for 24 h. Data are expressed relative to EV-control set to 100%. **Right**, Pooled lysates from OCR measurement were separated on an SDS-PAGE gel and probed for MNRR1, phospho-JNK, and total JNK levels. Actin was probed as a loading control.



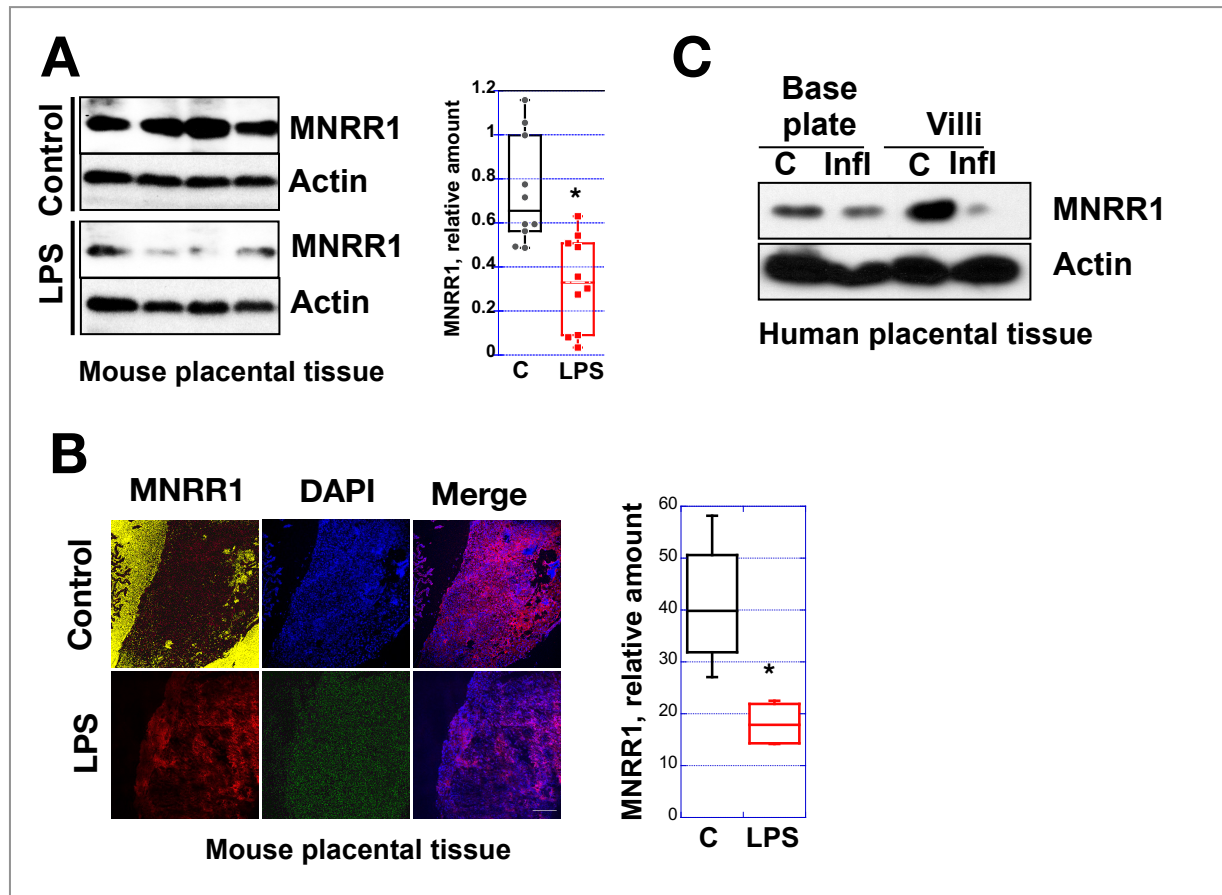

**Figure 2: MNRR1 protein levels are reduced *in vivo* in placental inflammation.** (A) *Left*, Placental lysates from control (PBS) versus LPS (intraperitoneally) injected mice were separated on an SDS-PAGE gel and probed for MNRR1 levels. Actin was used as a loading control. *Right*, MNRR1 levels relative to Actin with one point for each animal. (B) *Left*, Placental tissue sections from control (PBS) versus LPS injected mice analyzed using immunofluorescence staining. *Right*, Relative MNRR1 fluorescence is shown. (C) Equal amounts of human placental lysates from an individual without inflammation and one with systemic inflammation were separated on SDS-PAGE gel and probed for MNRR1. Actin was probed as a loading control.

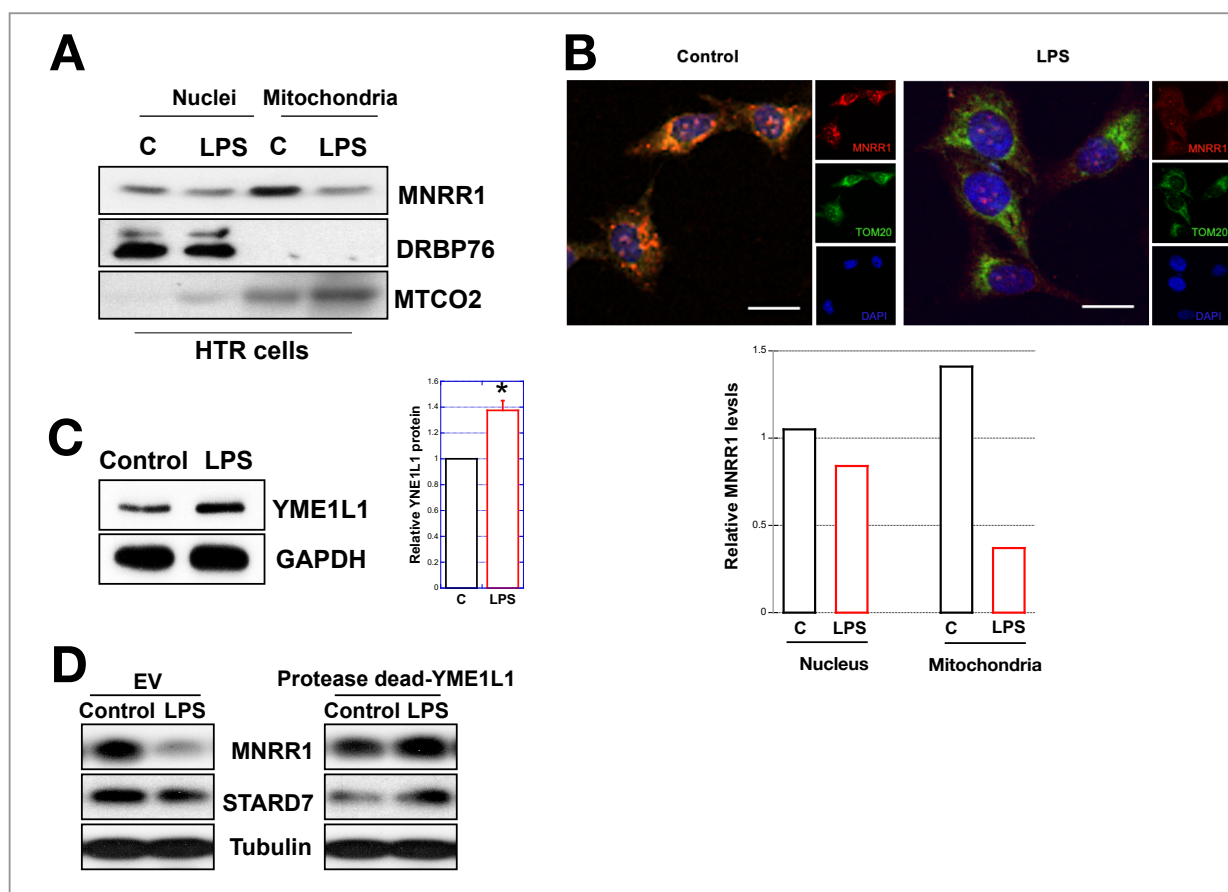

**Figure 3: Compartment-specific reduction in MNRR1 levels in human placental cells treated with LPS is mediated by YME1L1 protease.** (A) Equal amounts HTR cell nuclear and mitochondrial fractions were separated on an SDS-PAGE gel and probed for MNRR1. DRBP76 and MTCO2 were probed to assess purity of fractions. (B) HTR cells were treated with control or LPS and immunostained for MNRR1 (red fluorescence). DAPI (blue fluorescence) was stained as a nuclear marker and TOM20 (green fluorescence) as a mitochondrial marker. *Below*, The graph represents MNRR1 levels relative to a compartment-specific control for each treatment. (C) *Left*, Equal amounts of HTR cells treated with control or LPS were separated on an SDS-PAGE gel and probed for YME1L1. Actin was probed as loading control. *Right*, The graph represents YME1L1 levels relative to GAPDH. (D) HTR cells overexpressing either an empty vector (EV) or a protease-dead (PD) mutant of YME1L1. Cells were treated with control or LPS. Equal amounts of cell lysates were separated on an SDS-PAGE gel and probed for MNRR1 and STARD7. Tubulin was probed as loading control.

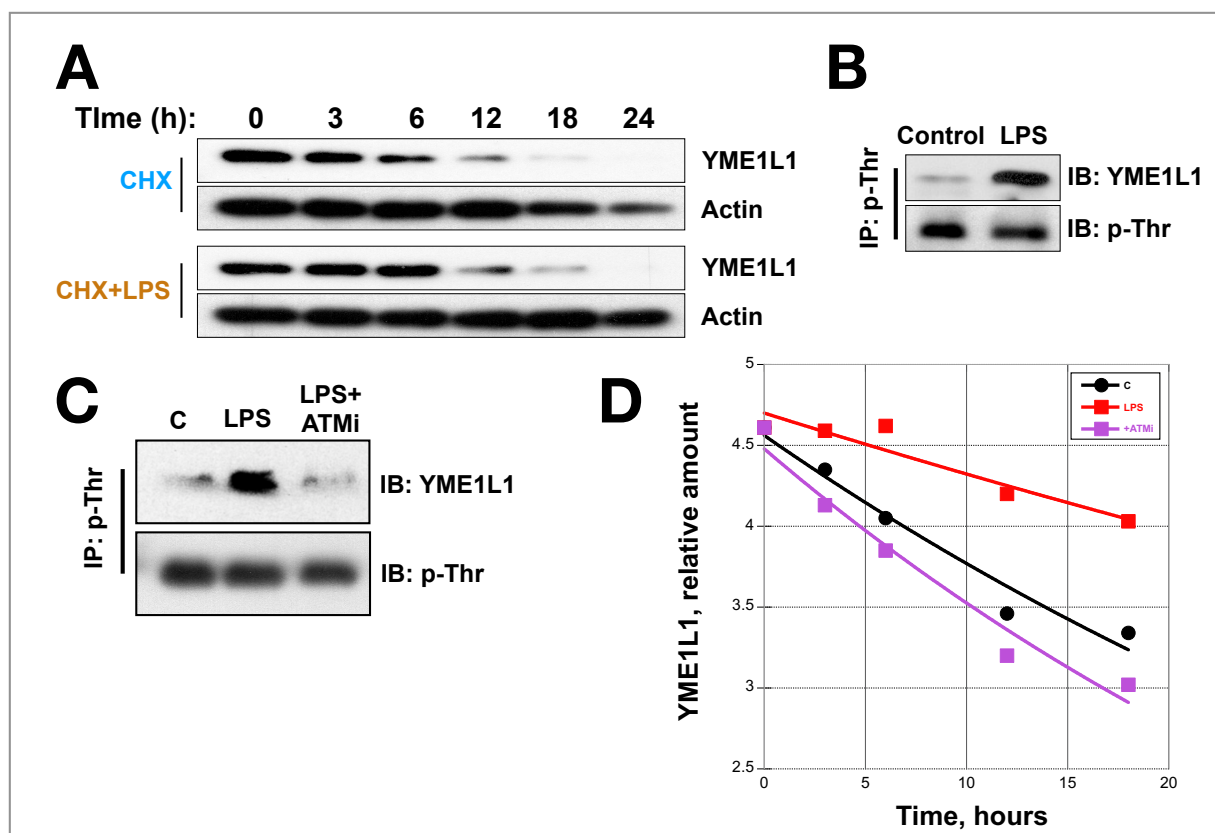

**Figure 4: LPS treatment of placental cells increases the stability of YME1L1 via threonine phosphorylation by ATM kinase. (A)** Equal numbers of HTR cells were plated on a 6-well plate and treated with control or LPS and 100  $\mu\text{g}/\text{mL}$  cycloheximide for the durations shown. Equal amounts of cell lysates were separated on an SDS-PAGE gel and probed for YME1L1. Actin was probed as loading control. **(B)** HTR cells were treated with vehicle or LPS and equal amounts of whole cell lysates were used for immunoprecipitation using a phospho-threonine antibody. Equal amounts IP eluates were then probed for YME1L1. Antibody heavy chain (p-Thr) was probed to assess loading. **(C)** HTR cells were treated with control, LPS, or LPS+ATM inhibitor (1  $\mu\text{M}$ ) for 24 h. Equal amounts of whole cell lysates were used for immunoprecipitation by phospho-threonine antibody. Equal amounts IP eluates were probed for YME1L1 antibody and heavy chain (p-Thr) was probed to assess loading. **(D)** Graph for YME1L1 levels from HTR cells were treated with control, LPS, or LPS+ATM inhibitor (1  $\mu\text{M}$ ) and 100  $\mu\text{g}/\text{mL}$  cycloheximide for the durations shown in (A). The amount relative to time = 0 was graphed.

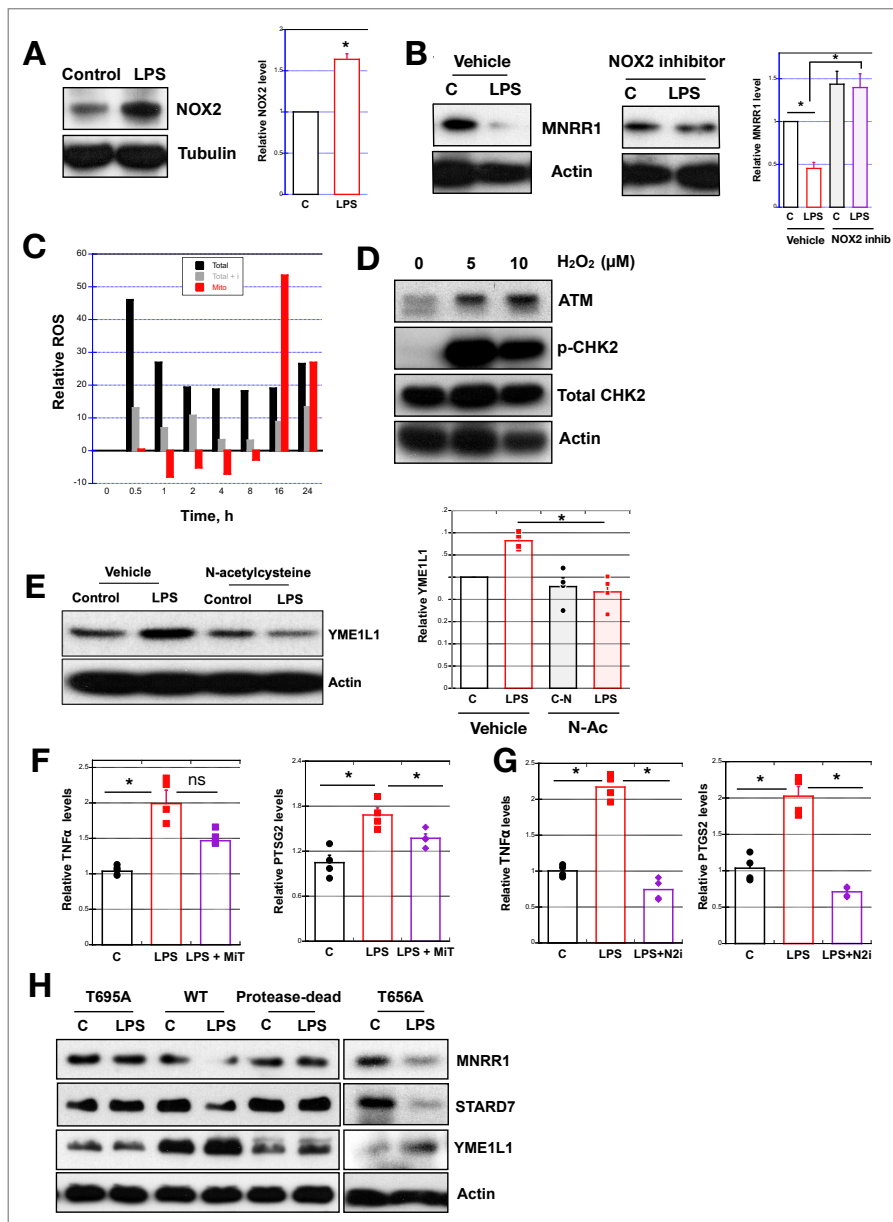

**Figure 5: ROS generated by NOX2 activates ATM kinase in LPS treated placental cells. (A)**

*Left*, Equal amounts of HTR cells treated with control (water) or LPS were separated on an SDS-PAGE gel and probed for NOX2. Tubulin was probed as loading control. *Right*, NOX2 levels relative to tubulin are shown. **(B)** *Left*, Equal amounts of HTR cells were treated for 24 h with control (water) or LPS and, for 2<sup>nd</sup> blot, 25 μM NOX2 inhibitor (using DMSO in control); lysates were separated on an SDS-PAGE gel and probed for NOX2. Actin was probed as loading control. *Right*, Relative MNRR1 levels are shown for each lane. **(C)** HTR cells were treated with control (water) or LPS for the times shown and ROS levels were measured as in Figure 1C. Total ROS, black; mitochondrial ROS, red; total ROS with ATM inhibitor, grey. **(D)** Equal amounts of HTR cells were treated with control (water) or hydrogen peroxide (H<sub>2</sub>O<sub>2</sub>) for 16 h and lysates separated on an SDS-PAGE gel and probed for p-CHK2, total CHK2, and ATM kinase. Actin was probed as loading control. **(E)** *Left*, Equal amounts of HTR cells treated with control (water) or LPS with either Vehicle (DMSO) or 100 μM N-acetyl cysteine for 24 h were separated on an SDS-PAGE gel and probed for YME1L1. Actin was probed as loading control. *Right*, Relative YME1L1 levels are shown for each condition. **(F)** *TNFα* and *PTGS2* transcript levels relative to *Actin* were measured in HTR cells treated with Control (water), LPS, or LPS + 20 μM MitoTempo. **(G)** *TNFα* and *PTGS2* relative transcript levels in HTR cells treated with Control (DMSO), LPS (LPS+DMSO) or LPS + 25 μM NOX2 inhibitor.

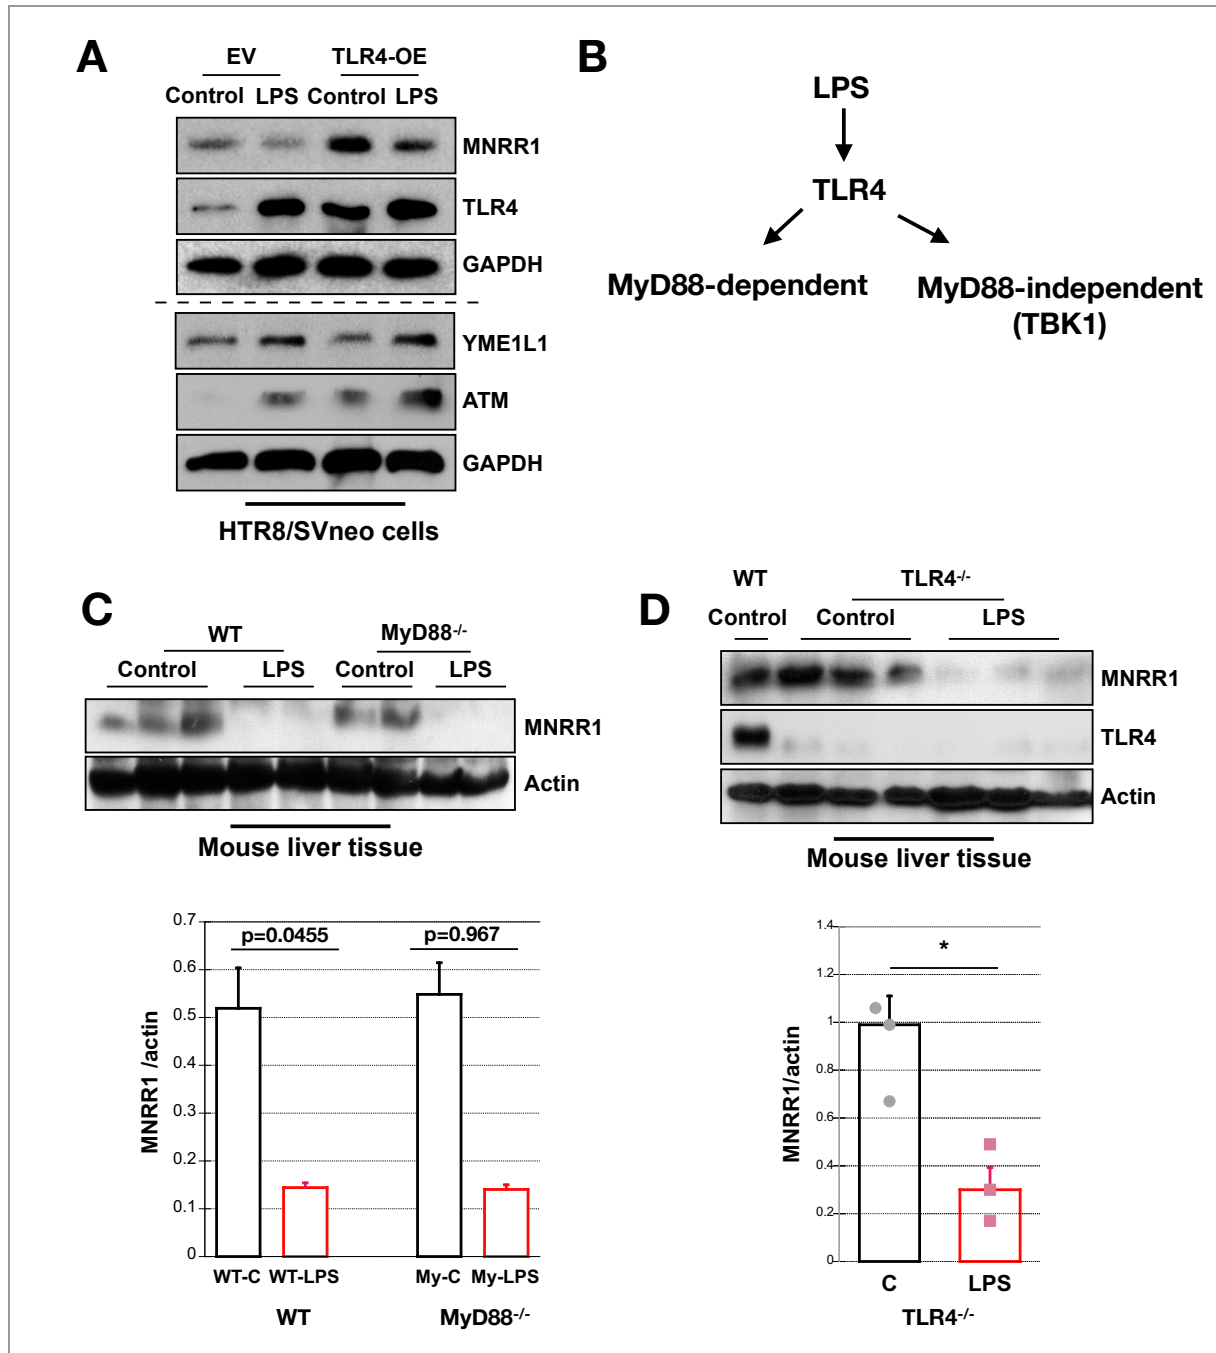

**Figure 6: Novel TLR4-independent signaling pathway is responsible for MNRR1-dependent reduction in LPS treated placental cells. (A)** Equal amounts of HTR cells overexpressing EV or TLR4 were treated or not with LPS, then lysates were separated on an SDS-PAGE gel and probed for MNRR1, TLR4, YME1L1, and ATM kinase. GAPDH was probed as loading control. **(B)** Schematic diagram for the two arms of the TLR4 signaling pathway. **(C)** *Above*, Equal amount of tissue lysates (WT or MyD88<sup>-/-</sup>) from mouse liver injected intraperitoneally with PBS (control) or LPS were separated on an SDS-PAGE gel and probed for MNRR1. Actin was probed as loading control. *Below*, The graph shows relative MNRR1 levels. **(D)** *Above*, Equal amount of liver lysates from mice (WT or TLR4<sup>-/-</sup>) that had been injected intraperitoneally with PBS (control) or LPS were separated on an SDS-PAGE gel and probed for MNRR1. Actin was probed as loading control. *Below*, Graph shows relative MNRR1 levels on blots.

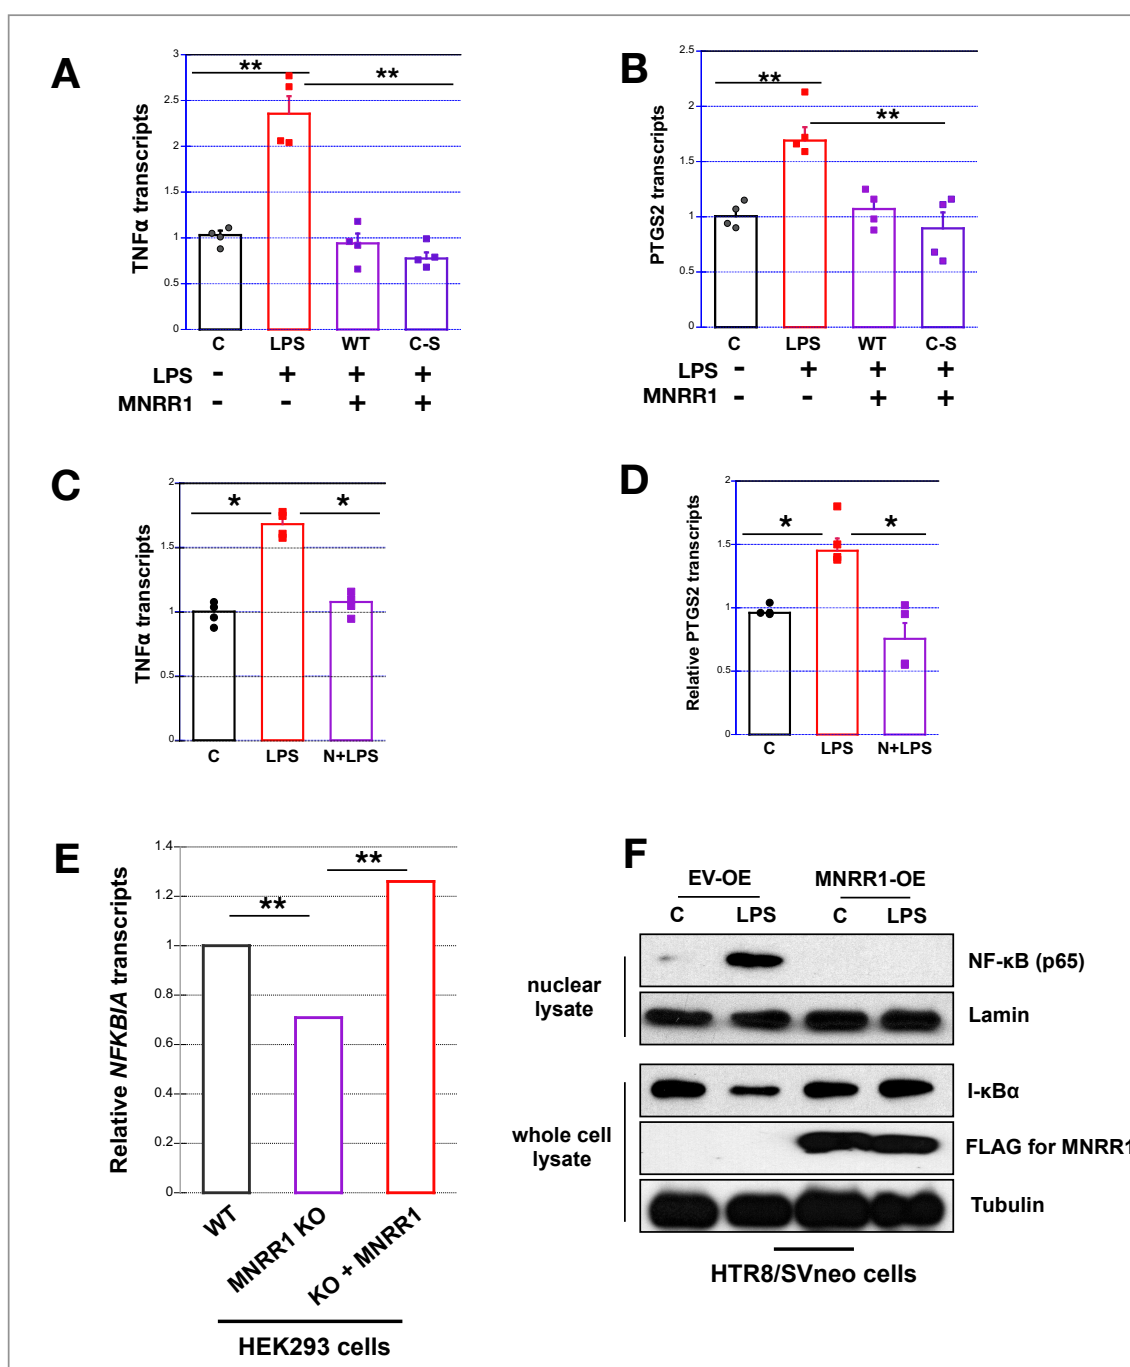

**Figure 7: MNRR1 functions as anti-inflammatory via its nuclear function.** (A) Relative *TNF $\alpha$*  and (B) *PTGS2* transcript levels in HTR cells treated with Control (EV), LPS (EV + LPS), WT-MNRR1 (WT + LPS), or C-S-MNRR1 (C-S + LPS). (C) Relative *TNF $\alpha$*  and (D) *PTGS2* transcript levels in HTR cells treated with Control (DMSO), LPS (LPS + DMSO), or LPS + 10  $\mu$ M Compound N. (E) RNA-sequencing (HEK293 cells) showing that *NFKB1A* transcript levels are significantly reduced in MNRR1 knockout cells (KO) relative to wild type controls (WT). This reduction is rescued by overexpressing the transcriptionally active mutant of MNRR1 (K119R-MNRR1). (F) Nuclear NF- $\kappa$ B EV or MNRR1 and treated with control or LPS. Lamin was probed as a nuclear loading control. Whole cell lysates from the same experiment were probed for I- $\kappa$ B and FLAG (MNRR1) levels. Tubulin was probed as loading control.

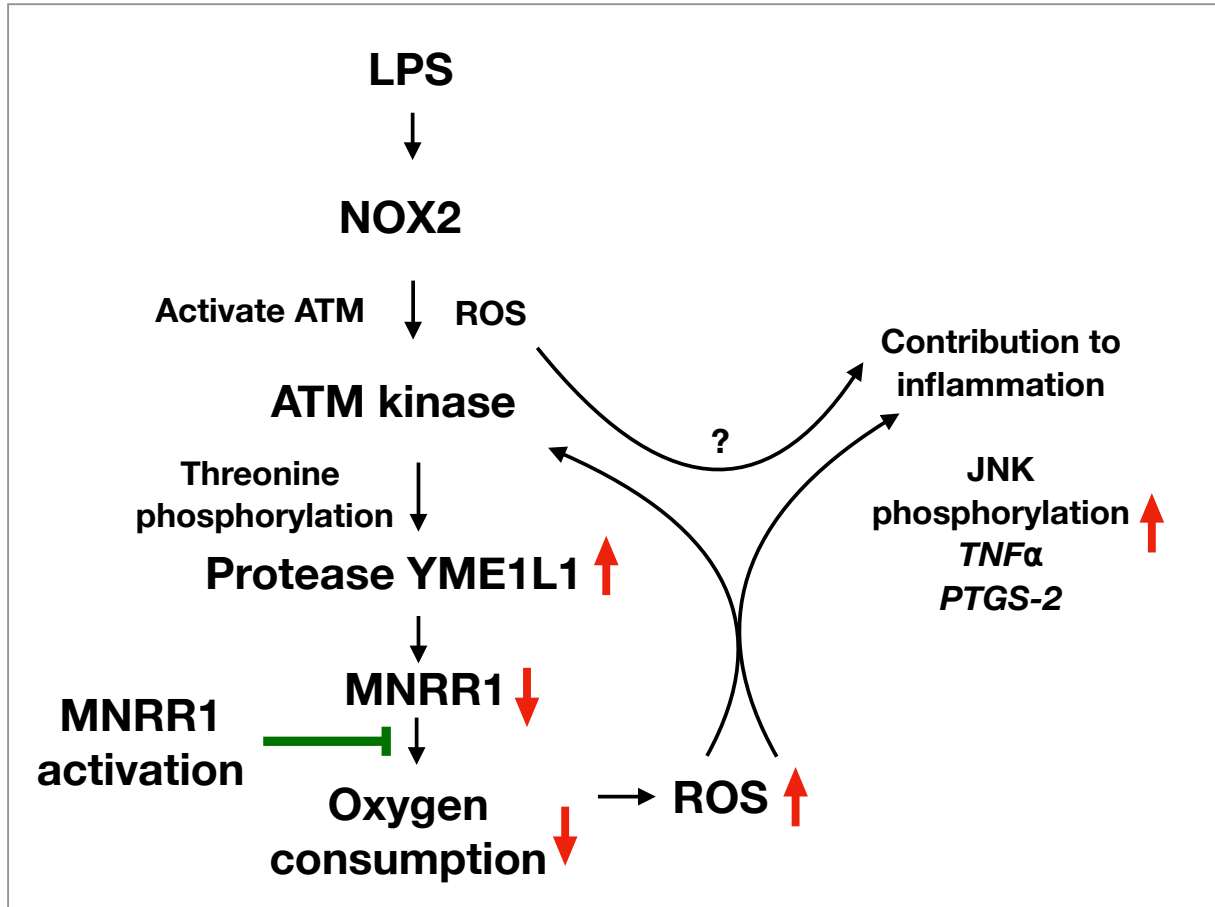

**Figure 8: Model of MNRR1 action to suppress inflammation.** Schematic summary of the role of MNRR1 in inducing inflammation. Bacterial endotoxin activates ATM kinase via NOX2-mediated ROS. Increased ATM activity in turn stabilizes YME1L1 protease by enhancing its threonine phosphorylation. Increased YME1L1 protease degrades MNRR1 to reduce oxygen consumption and increase ROS levels that contribute towards an inflammatory phenotype as evidenced by increased levels of *TNFα* and *cyclooxygenase-2* (*PTGS2*). Activation of MNRR1 can prevent a reduction in mitochondrial function and increase of ROS levels, thereby preventing inflammation.



## Supplementary Figures

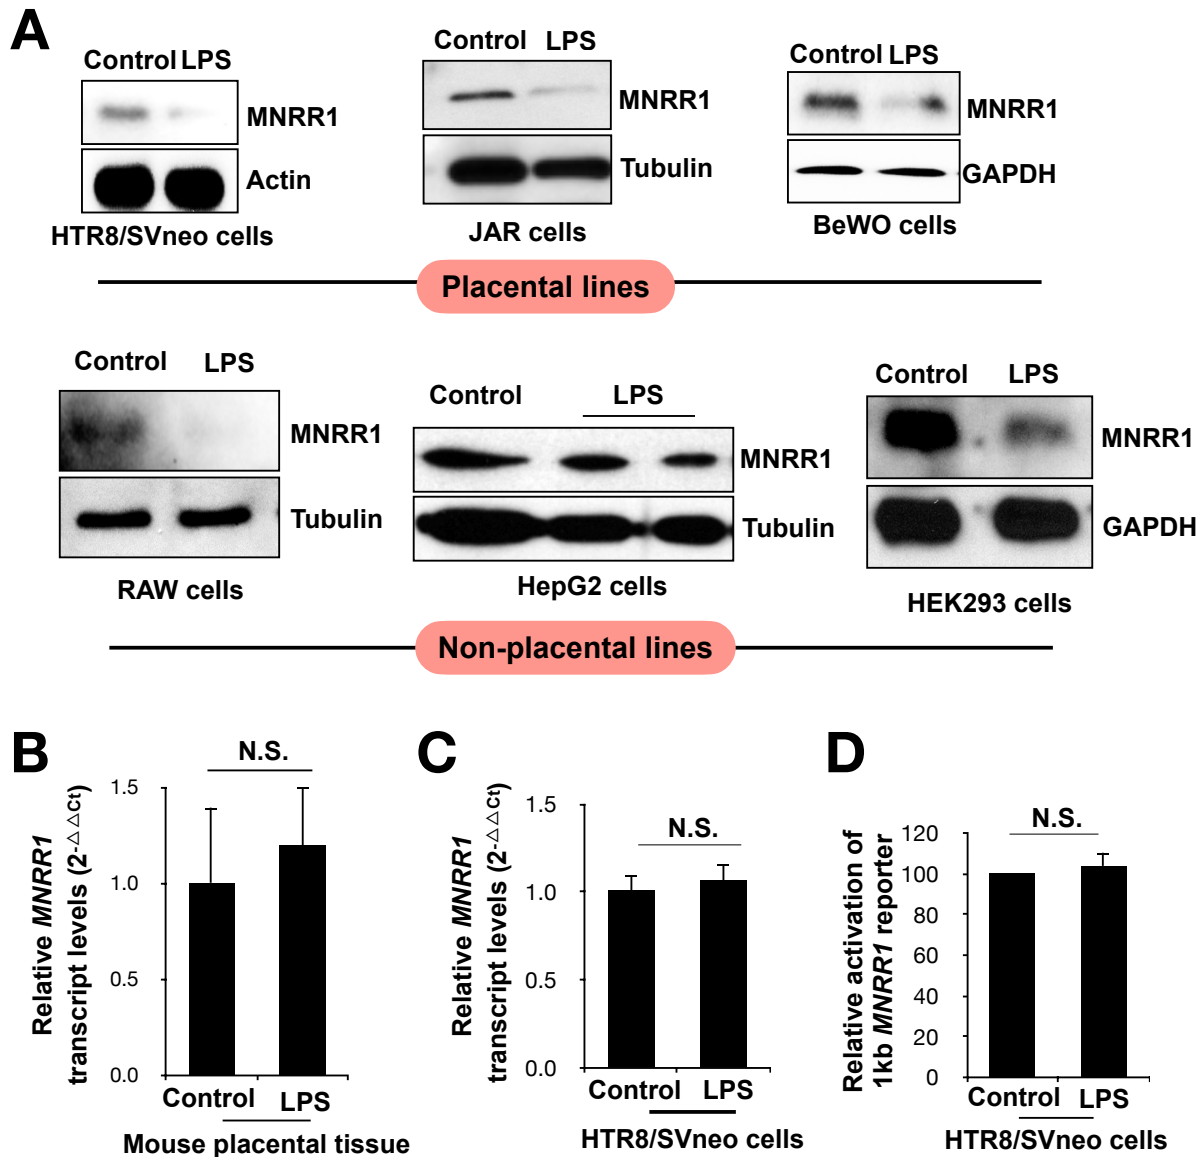

**Supplementary Figure 1.** (A) Generality of LPS-stimulated reduction of *MNRR1* levels by western analysis of lysates of various cell lines treated with control or LPS, then probed for *MNRR1* and labeled loading control. *MNRR1* transcript levels are shown relative to *Actin* in mouse placental tissues (B), and HTR cells (C). (D) Transcript levels of *MNRR1*-luciferase reporter in HTR cells.



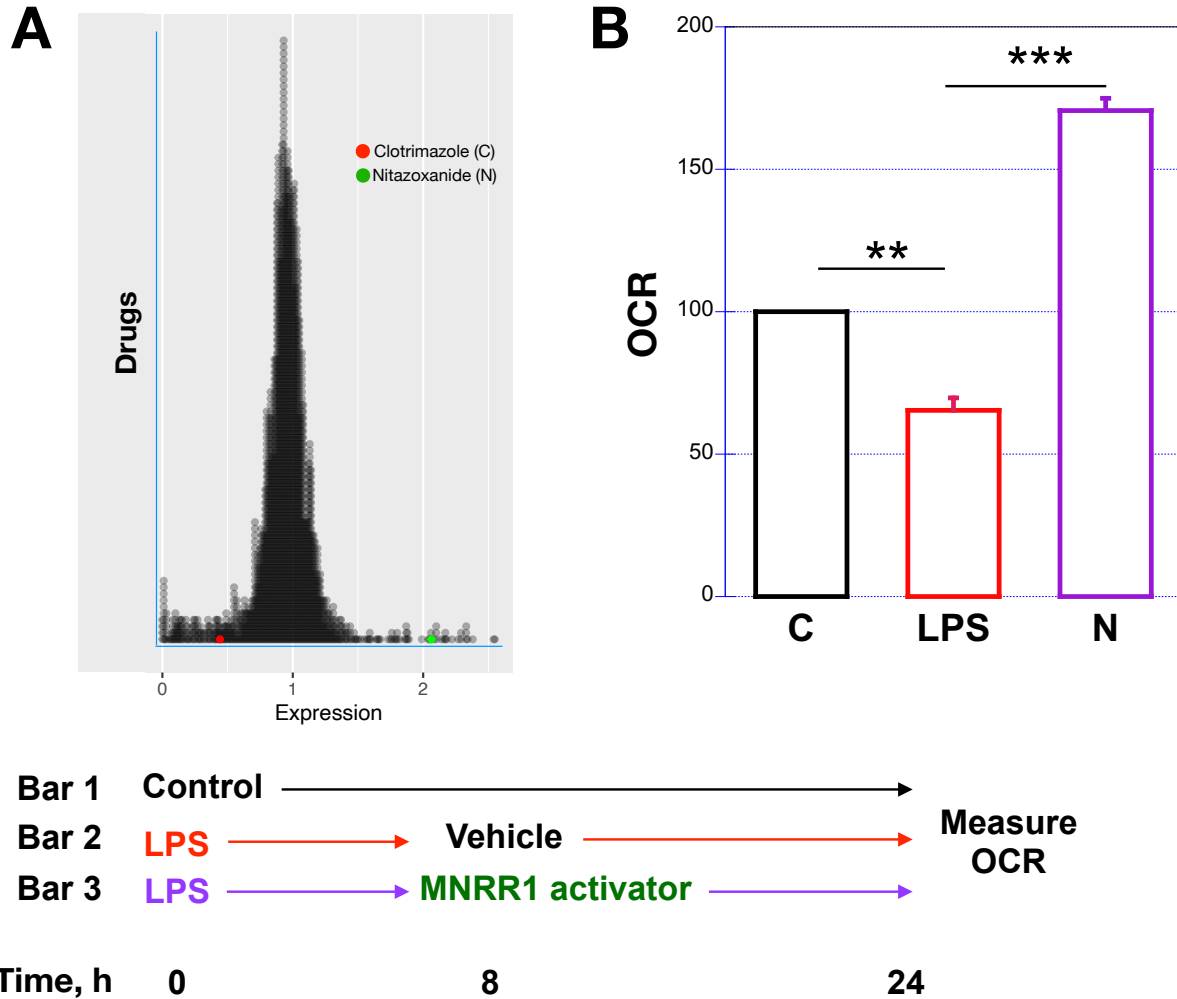

**Supplementary Figure 2. (A)** Results of screen of 2400 FDA-approved drugs identified to transcriptionally activate (>1), inhibit (<1) or not affect (=1) MNRR1. Each circle represents one drug and the MNRR1 activator (Nitazoxanide (N), green) and MNRR1 inhibitor (Clotrimazole (C), red) have been highlighted. **(B)** Intact cellular oxygen consumption in HTR cells treated as described in the scheme below.

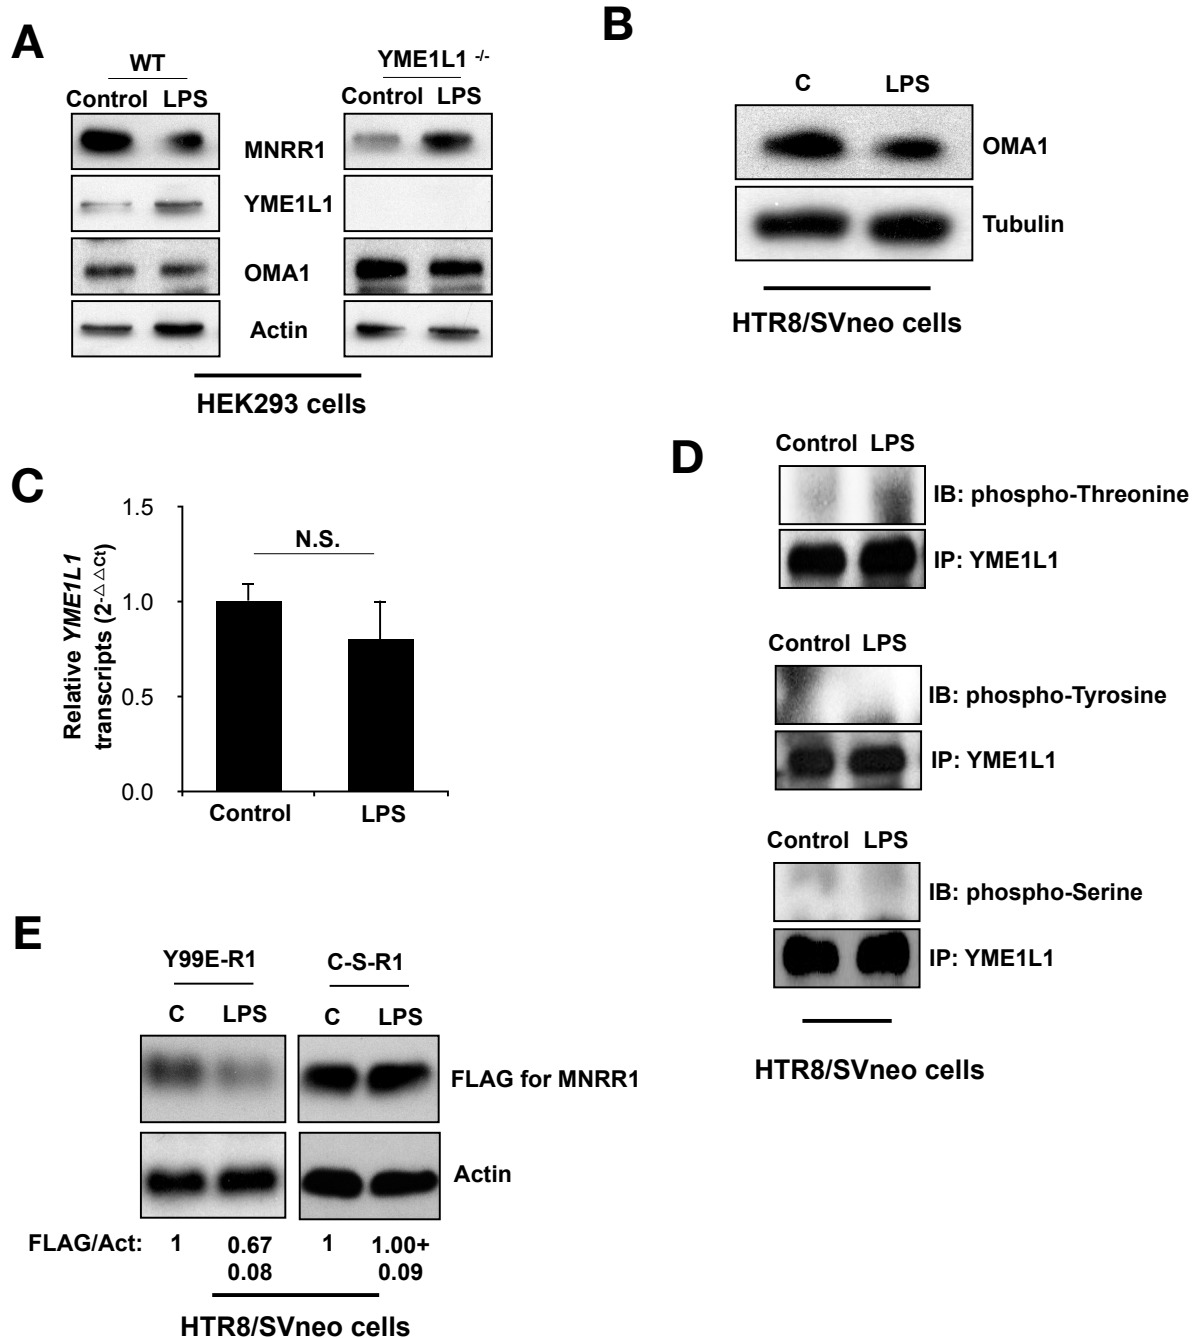

**Supplementary Figure 3.** (A) Equal amounts of WT or YME1L1<sup>-/-</sup> cells treated with control or LPS (1  $\mu$ g/mL) for 24 h were separated on an SDS-PAGE gel and probed for MNRR1, YME1L1, and OMA1. Actin was probed as loading control. (B) Equal amounts of HTR cells treated with control (water) or LPS (500 ng/mL) were separated on an SDS-PAGE gel and probed for OMA1. Actin was probed as loading control. (C) YME1L1 transcript levels relative to Actin in HTR cells. (D) HTR cells were treated with control (water) or LPS. Equal amounts of whole cell lysates were used for immunoprecipitation with a YME1L1 antibody. Equal amounts IP eluates were probed for p-Serine, p-Threonine, or p-Tyrosine and YME1L1 was probed to assess loading. (E) Equal amounts of HTR cells overexpressing FLAG-tagged Y99E or C-S-MNRR1 were treated with control or LPS and lysates were separated on an SDS-PAGE gel and probed for FLAG. Actin was probed as loading control.

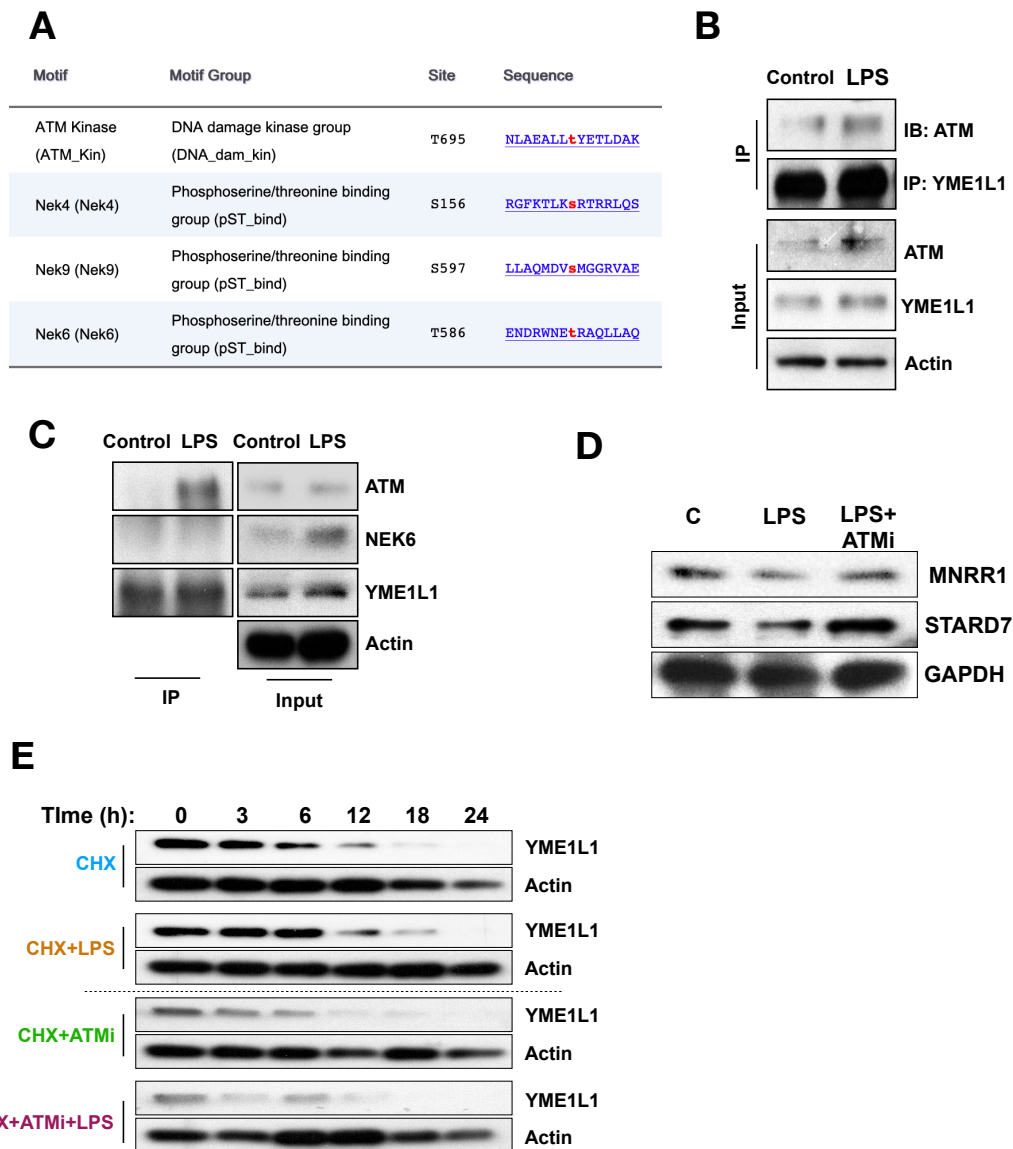

**Supplementary Figure 4. (A)** Bioinformatic prediction from Scansite for kinases that might phosphorylate YME1L1. **(B)** Interaction of YME1L1 and ATM kinase. HTR cells were treated with water or LPS. Equal amounts of whole cell lysates were used for immunoprecipitation with YME1L1 antibody. Equal amounts IP eluates were probed for ATM kinase and YME1L1, the latter to assess loading. Input lysates were also probed for ATM and YME1L1 and Actin was probed as loading control. **(C)** Interaction of YME1L1 and NEK6 kinase. HTR cells were treated with water or LPS. Equal amounts of whole cell lysates were used for immunoprecipitation using YME1L1 antibody. Equal amounts IP eluates were probed for ATM kinase, NEK6, and YME1L1 was probed to assess loading. Input lysates were also probed for ATM, NEK6, and YME1L1 and actin was probed as loading control. **(D)** HTR cells were treated with vehicle, LPS, or LPS plus ATM inhibitor (1  $\mu$ M) for 24 h. Equal amounts of cell lysates were separated on an SDS-PAGE gel and probed for MNRR1 and STARD7. GAPDH was probed as loading control. **(E)** Data used for time course of YME1L1 turnover (Figure 4D). Equal numbers of HTR cells were plated on a 6-well plate and treated with water or LPS and 100  $\mu$ g/mL cycloheximide for the times shown. Equal amounts cell lysates were separated on an SDS-PAGE gel and probed for YME1L1. Actin was probed as loading control.

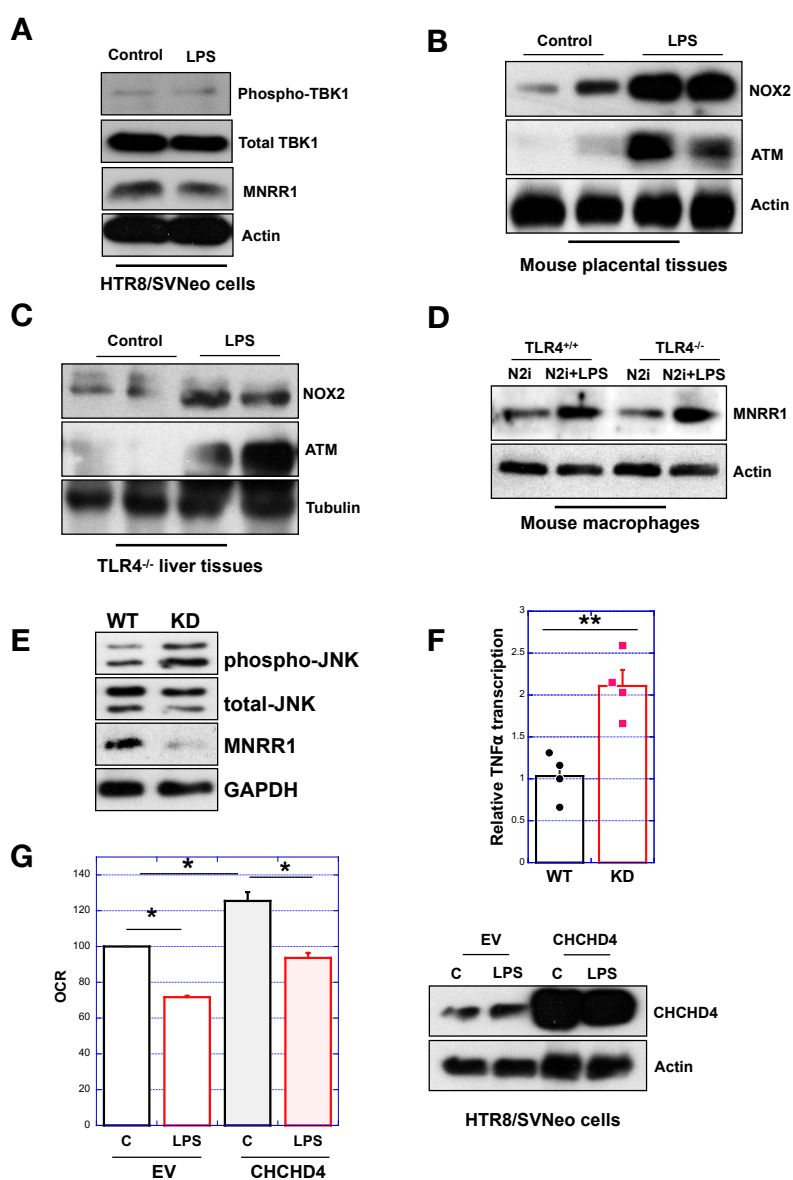

**Supplementary Figure 5.** (A) Equal amounts of HTR cells treated with water or LPS (500 ng/mL) were separated on SDS-PAGE and probed for p-TBK1, total TBK1, and MNRR1. Actin was probed as loading control. (B) Placental lysates from control (PBS) versus LPS (intraperitoneally) injected mice were separated on an SDS-PAGE gel and probed for NOX2 and ATM kinase levels. Actin was used as a loading control. (C) Mouse liver lysates from TLR4<sup>-/-</sup> control (PBS) versus LPS injected mice were separated on an SDS-PAGE gel and probed for NOX2 and ATM kinase levels. Tubulin was probed as a loading control. (D) Equal amounts of WT or TLR4<sup>-/-</sup> mouse macrophage cells were treated with the NOX2 inhibitor with or without LPS (500 ng/mL) and lysates were separated on SDS-PAGE and probed for MNRR1. Actin was probed as loading control. (E) Equal amounts of WT or MNRR1-KD HTR cell lysates were separated on an SDS-PAGE gel and probed for phospho-JNK, total JNK, and MNRR1 levels. GAPDH was probed as loading control. (F) Relative *TNF $\alpha$*  transcript levels in WT or MNRR1-KD HTR cells. (G) *Left*, Intact cellular oxygen consumption in HTR cells overexpressing EV or CHCHD4 and treated with control (water) or LPS for 24 h. Data are expressed relative to EV-control set to 100%. *Right*, Pooled lysates from OCR measurement were separated on an SDS-PAGE gel and probed for CHCHD4 levels. Actin was probed as a loading control.
